1

2

3

# The Role of the Wnt/PCP Formin Daam1 in Renal Ciliogenesis

4

5

**Mark E. Corkins<sup>†@</sup>, Vanja Krneta-Stankic<sup>†‡§@</sup>, Malgorzata Kloc<sup>||¶</sup>, Pierre D. McCreas<sup>§¶</sup>, Andrew B. Gladden<sup>§¶</sup>,**

6

**Rachel K. Miller<sup>†§¶#\*</sup>**

7

<sup>†</sup> Department of Pediatrics, Pediatric Research Center, UTHealth McGovern Medical School, Houston Texas 77030

8

<sup>‡</sup> MD Anderson Cancer Center UTHealth Graduate School of Biomedical Sciences, Program in Genes and Development, Houston Texas 77030

9

<sup>§</sup> MD Anderson Cancer Center UTHealth Graduate School of Biomedical Sciences, Program in Genetics & Epigenetics, Houston, Texas 77030

10

<sup>||</sup> Houston Methodist, Research Institute, Houston Texas 77030

11

<sup>¶</sup> Department of Genetics, University of Texas MD Anderson Cancer Center, Houston Texas 77030

12

<sup>#</sup> MD Anderson Cancer Center UTHealth Graduate School of Biomedical Sciences, Program in Biochemistry & Cell Biology, Houston Texas 77030

13

<sup>@</sup> These authors contributed equally to this work

14

<sup>\*</sup> Correspondence: Rachel.K.Miller@uth.tmc.edu; Tel.: +01-713-500-6537

15

**Running Head.** Role of Daam1 in primary ciliogenesis

## 16 ABSTRACT

17 Kidneys are composed of numerous ciliated epithelial tubules called nephrons. Each nephron functions to reabsorb  
18 nutrients and concentrate waste products into urine. Defects in primary cilia are associated with abnormal formation of  
19 nephrons and cyst formation in a wide range of kidney disorders. Previous work in *Xenopus laevis* and zebrafish embryos  
20 established that loss of components that make up the Wnt/PCP pathway, Daam1 and ArhGEF19 (wGEF) perturb kidney  
21 tubulogenesis. Dishevelled, which activates both the canonical and non-canonical Wnt/PCP pathway, affect cilia  
22 formation in multiciliated cells. In this study, we investigated the role of the noncanonical Wnt/PCP components Daam1  
23 and ArhGEF19 (wGEF) in renal ciliogenesis utilizing polarized mammalian kidney epithelia cells (MDCKII and IMCD3) and  
24 *Xenopus laevis* embryonic kidney. We demonstrate that knockdown of Daam1 and ArhGEF19 in MDCKII and IMCD3 cells  
25 leads to loss of cilia, and Daam1's effect on ciliogenesis is mediated by the formin-activity of Daam1. Moreover, Daam1  
26 co-localizes with the ciliary transport protein IFT88. Interestingly, knocking down Daam1 in *Xenopus* kidney does not  
27 lead to loss of cilia. This data suggests a new role for Daam1 in the formation of primary cilia.

## 28 INTRODUCTION

29 Primary cilia are microtubule-based cellular protrusions that allow a cell to sense its environment (Satir *et al.*, 2010).  
30 Many cell types in the body contain cilia, and improper cilia development results in a family of diseases called  
31 ciliopathies, including polycystic kidney disease, nephronophthisis, Joubert syndrome and Bardet–Biedel syndrome (Lee  
32 and Gleeson, 2011). Although ciliopathies can manifest in a number of different ways, the vast majority of ciliopathies  
33 result in kidney abnormalities (Arts and Knoers, 2013). For example, one of the first described ciliopathies is the result of  
34 a mutation in the gene IFT88/Polaris, a protein is transported within vesicles to facilitate ciliary biogenesis (Yoder *et al.*,  
35 2002; Ding *et al.*, 2017). Loss of IFT88 leads to cystic kidney disease in both mouse and human (Moyer *et al.*, 1994;  
36 Onuchic *et al.*, 1995). Additionally, loss of IFT88 in human mesenchymal stem cells leads to increased Wnt signaling  
37 (McMurray *et al.*, 2013).

38 The canonical Wnt pathway has many connections to cilia development. In the zebrafish left/right organizer, loss of  $\beta$ -  
39 catenin, the Wnt co-transcription factor, results in a reduction of cilia (Zhu *et al.*, 2015). In mouse and *Xenopus laevis* a  
40 protein called Chibby1, which functions to shuttle  $\beta$ -catenin out of the nucleus, localizes to the cilia and is required for

41 proper ciliogenesis and kidney development (Lee *et al.*, 2014; Shi *et al.*, 2014). Additionally, mutations in genes that  
42 regulate cilia formation typically results in increased sensitivity to Wnt ligands, although the mechanism for this  
43 phenomenon is heavily debated (Corbit *et al.*, 2008). Moreover, Dishevelled, a component of both the canonical and  
44 non-canonical Wnt pathway, is required for actin assembly and positioning of the basal bodies on the surface of the cell  
45 during ciliogenesis in *X. laevis* multiciliated skin cells (Park *et al.*, 2008).

46 Actin filaments are important for proper ciliogenesis. In motile multiciliated cells, the cilia are connected by an actin  
47 network (Werner *et al.*, 2011). Although this actin network is not clearly visible around primary cilia, application of drugs  
48 that broadly inhibit or stabilize actin filaments typically results in longer primary cilia (Drummond *et al.*, 2018). Formin  
49 proteins act to polymerize actin filaments. However, treatment with the formin inhibitor smiFH2 has been found to  
50 decrease the number and length of primary cilia (Copeland *et al.*, 2018). This suggests a complex story in which different  
51 sub-populations of actin can have either a positive or negative affect on ciliogenesis.

52 Daam1 (Dishevelled Associated Activator of Morphogenesis 1) is a Diaphanous-related Formin homology (DRF) protein  
53 that functions through the non-canonical Wnt/PCP pathway. It is regulated in part by Wnt ligands through Frizzled  
54 receptors and Dishevelled (Liu *et al.*, 2008). Daam1 is associated with a number of cellular functions, such as directed  
55 cell migration, planar cell polarity (PCP) and endocytosis (Kida *et al.*, 2007; Hoffmann *et al.*, 2014; Luo *et al.*, 2016).  
56 Developmentally, Daam1 is necessary for gastrulation and normal kidney development in *X. laevis* (Habas *et al.*, 2001;  
57 Miller *et al.*, 2011; Corkins *et al.*, 2018). Additionally, it is present in the multiciliated epidermal cells of the *X. laevis* skin  
58 where it regulates the actin network that stabilizes cilia. Loss of Daam1 in motile cilia results in their loss of polarity  
59 (Yasunaga *et al.*, 2015).

60 The Diaphanous family of formin proteins is regulated by the Rho family of GTPases (Alberts, 2001). Daam1 is known to  
61 bind to RhoA, a protein that regulates cytoskeletal dynamics. However unlike other Diaphanous family formin proteins,  
62 Daam1 is thought to be more strongly regulated by Dishevelled than Rho (Liu *et al.*, 2008). Wnt signaling through  
63 Dishevelled can activate RhoA, a process that is regulated by the Daam1/ArhGEF19 (wGEF) complex (Tanegashima *et al.*,  
64 2008). In mice, *arhgef19* is expressed mainly in the intestine, liver, heart and kidney (Wang *et al.*, 2004), and loss of  
65 either ArhGEF19 or Daam1 in *X. laevis* leads to kidney malformations (Miller *et al.*, 2011; Corkins *et al.*, 2018).

66 In this study, we find that loss of the PCP component Daam1 negatively regulates ciliogenesis in MDCKII and IMCD3 cells.  
67 Daam1 knockdown within these mammalian kidney epithelial cells result in the formation of fewer cilia. Furthermore,  
68 knockdown of Daam1 within *Xenopus* embryonic kidneys does not appear to result in disruption of primary ciliogenesis.  
69 Daam1 deficient kidneys have primary cilia; however, we cannot exclude the possibility that their structure, organization  
70 and/or function is not affected. Our data indicate that ciliogenesis in MDCKII cells depends on the formin activity of  
71 Daam1. Additionally, the Daam1 partner, ArhGEF19, is also required for proper cilia formation in MDCKII cells. Finally,  
72 we found that in MDCKII and IMCD3 cells Daam1 localizes in vesicles that carry ciliary components, further supporting its  
73 role in ciliogenesis.

## 74 RESULTS

### 75 Loss of Daam1 results in a failure of kidney epithelial cells to ciliate

76 To determine whether Daam1 is required for primary ciliogenesis, *daam1* was knocked down in polarized MDCKII cells.  
77 MDCKII kidney epithelia form primary cilia when plated on a transwell membrane and are allowed to grow until  
78 confluency. Loss of Daam1 leads to cilia reduction in MDCKII cells (Figure 1). To ensure that this phenotype is due to loss  
79 of Daam1 we used two different shRNAs: one targeting the 3'UTR (#1) and one targeting the coding sequence of *daam1*  
80 (#3). Both shRNAs reduce Daam1 protein expression as visualized by Western blot (Figure 1E). A third shRNA, *sh-daam1*  
81 #2, failed to reduce Daam1 expression (Figure 2C). Additionally, similar experiments were carried out in IMCD3 cells  
82 using a *sh-daam1* #1 construct adapted for mice. These experiments also indicate that knockdown of *daam1* disrupts  
83 primary ciliogenesis (Figure S1A,B).

84 Not only do *sh-daam1* cells have fewer numbers of cilia, but the cells grow to a higher density and exhibit a tendency to  
85 grow on top of each other, rather than forming a cell monolayer. When wild type cells pile on top of each other, they  
86 tend not to ciliate. Therefore, in our data analysis, we avoided scoring areas where cells failed to form a single  
87 monolayer.

88 MDCKII cells are used extensively to study renal tubulogenesis because they are capable of forming tubule-like  
89 structures when cultured in three-dimensional (3D) gels. These structures appear as single-layered, polarized, and  
90 hollow spherical cysts that closely reassemble the architecture of nephric tubules. Epithelial cells within cysts display

91 apico-basal polarity and form luminal cilia similar to that of a nephron (Baek *et al.*, 2016). Ciliogenesis is a complex  
92 process that may involve the interaction of cells with the extracellular matrix (ECM) (Bryant *et al.*, 2010). Thus, to further  
93 investigate the role of Daam1 in ciliogenesis, we cultured control and *sh-daam1* depleted cells in collagen I matrix.  
94 Control and Daam1 knockdown cells both formed 3D cysts; however, Daam1-depleted cysts showed perturbed primary  
95 ciliogenesis (Figure 2A and B). Daam1-depleted cysts showed a significant reduction of luminal cilia compared to  
96 controls (Figure 2A and B). Moreover, Daam1-depleted cysts displayed increased ciliogenesis on the basal – ECM facing  
97 side (Figure S2A and B). These results suggest that Daam1 is involved in regulating ciliogenesis and may be important for  
98 establishment and/or maintenance of apico-basal polarity. Additionally, we found that Daam1-depleted cells were more  
99 likely to form single lumens and present with cells within luminal space in comparison with control (Figure S2A and B).

### 100 **Daam1 formin activity is required for ciliogenesis**

101 Given prior studies indicating that the actin cytoskeleton that stabilizes multicilia in *X. laevis* skin, we hypothesized that  
102 the formin activity of Daam1 is required for ciliogenesis. Rescue experiments were carried out to investigate *sh-daam1*  
103 cilia phenotype using constructs that express either GFP-Daam1 or a GFP-Daam1(I698A) mutant, which disrupts the  
104 actin binding activity of the FH2 domain (Moseley *et al.*, 2006; Lu *et al.*, 2007). Due to significant toxicity upon stable  
105 overexpression of Daam1 we utilized transient transfections to express wild type Daam1 or Daam1(I698A).  
106 Approximately 30% of the cells had strong GFP expression. Wild type Daam1 partially rescued the reduced cilia  
107 phenotype (Figure 3) In contrast, the Daam1(I698A) mutant failed to rescue the cilia phenotype.

### 108 **Daam1 localizes in vesicles that carry ciliary components**

109 To further examine the role of Daam1 in ciliogenesis, the subcellular localization of Daam1 was observed in live cells  
110 transfected with GFP-Daam1. Daam1 predominantly localizes to highly motile puncta (Figure 4, S1C and S3).  
111 Additionally, because the Daam1 formin mutant failed to rescue loss of cilia and some of the Daam1 truncations such as  
112 Daam1(524-1078) fail to localize properly (Luo *et al.*, 2016), GFP-Daam1(I698A) localization was visualized to determine  
113 whether it is similar to that of wild type Daam1. mCherry versions of these constructs were made, then co-transfected.  
114 Both the wild type and I698A versions were found to colocalize with each other (Figure 4A).

115 To assess whether Daam1 is localized at the cilia, its localization was visualized concurrently with that of ciliary markers.  
116 Given that fixation and staining resulted loss of GFP-Daam1 signal, live cells were utilized to assess Daam1 localization.  
117 However, because MDCKII cells are polarized on an opaque membrane and a high level of autofluorescence appears  
118 after 5 days of confluency, MDCKII cells are not ideal for live imaging. Therefore, transiently transfected IMCD3 were  
119 ciliated on glass coverslips over a shorter period of time to directly visualize cilia in live cells. A GFP-Chibby1 construct  
120 was used to label the transition zone of the cilia and an  $\alpha$ -Tubulin-GFP construct was used to label the axoneme of the  
121 cilia (Figure S3) (Steere *et al.*, 2012). Using these constructs, co-localization of Daam1 with the ciliary transition zone or  
122 axoneme of cilia was not apparent.

123 Because vesicles are involved in cilium biogenesis, localization studies were carried out to determine whether Daam1  
124 puncta are vesicles that carry ciliary components. A mCherry-Daam1 construct was co-transfected with an IFT88-GFP  
125 construct (Ding *et al.*, 2017). Daam1 localizes to vesicles that carry IFT88 (Figure 4B, S1C). Both the IFT88 and Daam1  
126 labeled vesicles present in MDCKII cells are much smaller and more numerous than the vesicles in IMCD3 cells (Figures  
127 4B, S1C). Daam1 is found in vesicles that are labeled with IFT88, a gene involved in ciliogenesis.

### 128 **ArhGEF19 is required for ciliogenesis**

129 As loss of Daam1 results in loss of cilia, we assessed whether ArhGEF19, a RhoGEF that associates with Daam1 and acts  
130 within the non-canonical Wnt/PCP pathway, is required for ciliation. If RhoA activation is required for ciliogenesis, loss of  
131 ArhGEF19 should mimic the phenotypes shown in *sh-daam1* cells. Loss of *arhgef19* results in almost complete loss of  
132 cilia (Figure 5). Similar phenotypes were observed in *sh-arhgef19* cells and *sh-daam1* cells, with *sh-arhgef19* cells  
133 growing to higher density and exhibiting cilia loss. However, one distinction noted was that in contrast to *sh-daam1*  
134 cells, the *sh-arhgef19* cells do not grow on top of each other, indicating that distinct mechanism may also exist. The loss  
135 of cilia upon *arhgef19* depletion indicates that GTP-RhoA as part of the PCP pathway is necessary for ciliogenesis.

### 136 **Loss of Daam1 in *X. laevis* kidney does not cause loss of primary cilia**

137 Daam1 activity has been shown to be required for proper nephron development in both *Xenopus* and zebrafish embryos  
138 (Miller *et al* 2011). Given that changes in nephron morphology and ciliogenesis are closely linked, *Xenopus* embryos  
139 were used to assess the role of Daam1 in formation of renal primary cilia. To avoid gastrulation defects associated with

manipulating Daam1 expression in the whole embryo, a well-established kidney-targeted-morpholino approach was employed to knock down Daam1 activity in *Xenopus* nephric progenitors (Miller *et al.*, 2011; DeLay *et al.*, 2016; Corkins *et al.*, 2018). This approach consists of co-injecting Daam1 morpholino, or control morpholino, with mRNA encoding membrane-bound fluorescent protein (tracer to confirm correct delivery). Injections are made into selected blastomeres at the 8-cell stage that are fated to give rise to the kidney. As expected, Daam1 morpholino injected embryos show defects in nephron formation. Intriguingly, loss of primary renal cilia upon Daam1 knockdown was not observed (Figure 6), as was observed in MDCKII and IMCD3 cells following Daam1 depletion. While pronephric depletion of Daam1 leads to reduced elaboration of proximal and distal nephric tubules in stage 40 embryos, this phenotype is much less developed during early stages of nephron formation. To exclude the possibility that an earlier loss of renal tubules masks the loss of cilia phenotype, we also examined cilia in stage 30 embryos upon Daam1 knockdown. However, even in early stage embryos, there was no apparent loss of primary cilia upon Daam1 depletion (Figure S4). These data suggest that there are compensatory mechanisms that function *in vivo* to ensure proper ciliogenesis upon Daam1 knockdown.

## DISCUSSION

Prior work demonstrated that Daam1 is important for the proper development of motile multiciliated cells (Yasunaga *et al.*, 2015). Daam1 forms the actin network for proper anchoring of the basal bodies. However, a role for Daam1 in formation of primary sensory cilia has not previously been identified. In this study, we analyzed the role of Daam1 in renal primary ciliogenesis.

Within the three models examined, the degree to which Daam1 influences ciliogenesis is variable. 2D *sh-daam1*-depleted MDCK cultures show absence of cilia, while 3D cultures have a weaker phenotype and display reductions in luminal ciliogenesis. *X. laevis* Daam1-morpholino depleted embryonic kidneys have renal cilia. There have been prior studies pointing to different observations arising as a function of the experimental model being employed (O'Brien *et al.*, 2001; Baek *et al.*, 2016). This dependence of phenotype upon methodology suggests that other factors may compensate for Daam1 and are likely to be influenced by extrinsic factors. For example, other formin proteins may facilitate actin polymerization to stabilize cilia in the absence of Daam1 *in vivo*. Alternatively, elements of the extracellular environment, such as extracellular matrix components, may compensate for Daam1 loss in embryos. Alternatively, given

165 that Daam1 influences the positioning of motile cilia in *X. laevis* epidermal cells (Yasunaga *et al.*, 2015), it is possible that  
166 similar defects occur in renal primary cilia that are not be detectable by immunostaining.

167 It has previously been reported that Daam1 localizes to endocytic vesicles, actin filaments and the cell membrane (Kida  
168 *et al.*, 2007; Luo *et al.*, 2016). Based upon our finding that Daam1 localizes in vesicles that carry ciliary components,  
169 there are several potential mechanisms to explain how Daam1 plays a role in ciliogenesis. For example, Daam1 may be  
170 involved in vesicle trafficking to the base of the cilium or the docking of vesicles carrying ciliary components to the basal  
171 body. Alternatively, Daam1 be trafficked in vesicles to facilitate actin polymerization to stabilize ciliary structure at the  
172 base. Although we were not able to detect Daam1 at the primary cilia, it may only be transiently present or present at  
173 levels too low for us to detect. Daam1 is also necessary for proper centrosome orientation during cell migration. Ciliary  
174 basal bodies are modified centrosomes, so it is therefore possible that Daam1 performs an analogous function, in this  
175 case directing the orientation of the centrosome during ciliogenesis (Ang *et al.*, 2010).

176 The requirement of both ArhGEF19 and Daam1's formin activity for ciliogenesis indicates a dual role for Daam1 in  
177 ciliogenesis through both actin polymerization and RhoA activation (Moseley *et al.*, 2006; Lu *et al.*, 2007). While future  
178 study will be required, it is possible that ArhGEF19 is functioning through a Daam1-independent mechanism to promote  
179 ciliogenesis. Given that no other proteins that affect ArhG19 activity have been identified and the effector proteins of  
180 Wnt-activated RhoA signaling are currently unknown, it is difficult to disprove this hypothesis. Our data indicate a similar  
181 cilia phenotype upon *daam1* and *arhgef19* depletion. However, *sh-daam1* cells tend to grow on top of each other, while  
182 *sh-arhgef19* cells do not, suggesting unique deficits in cell migration and epithelization in the *sh-daam1* cells. Thus,  
183 subsequent study will be needed to elucidate the role of ArhGEF19 in ciliogenesis.

184 Overall, our work indicates that the planar cell polarity effector, Daam1, promotes the formation of primary cilia in  
185 MDCKII and IMCD3 kidney epithelial cells. The formin activity of Daam1 and the Daam1-associated GEF, ArhGEF19, are  
186 required for proper cilia formation. Given prior work in *X. laevis* skin indicating Daam1 affects the polarized orientation  
187 of motile cilia (Yasunaga *et al.*, 2015), it is possible that in the kidney it is also affecting organization of the primary cilia.  
188 However, our data showing that Daam1 localizes in vesicles that carry ciliary components indicates a novel mechanism  
189 by which Daam1 may play a role in ciliogenesis.



## 190 MATERIALS AND METHODS

### 191 Cell culture

192 All cells were grown at 37°C with 5% CO<sub>2</sub>. Cells grown for experiments were passaged prior to confluency as confluent  
193 cells required excessive trypsinizing resulting in problems with ciliation. MDCKII cells were grown in DMEM + 10%FCS +  
194 Antibiotic/Antimycotic solution (Sigma A5955)(Williams *et al.*, 2017) and IMCD3 cells were grown in DMEM/F12 +  
195 10%FCS + Antibiotic/Antimycotic solution (Mick *et al.*, 2015).

### 196 Transfections and stable cell line generation

197 pLKO.1 lentiviral construct along with packaging vector ΔVPR and VSVG plasmids were transfected using Fugene-6  
198 (Roche) or PEI (POLYSCIENCES 23966-2) into HEK293T cells grown on a 10cm dish (Moffat *et al.*, 2006). Supernatant  
199 containing transfection reagent was discarded and replaced with 5ml of fresh media. Supernatant was collected and  
200 replaced with 5ml fresh media over the course of 3 days resulting in 25ml of virus. The virus was filtered through 0.2µm  
201 filter to remove debris and frozen in 5ml aliquots at -80°C

202 Cells to be infected were split and allowed to grow to 50% confluency in a 10cm plate then washed with PBS. Virus was  
203 thawed at 37°C and 5µl 10mg/ml polybrene (Sigma H9268) was added to the virus, then the entire 5mls were added to  
204 cells. Cells were allowed to incubate with virus for 24 hours. Virus was then washed off and replaced with DMEM and  
205 the cells were allowed to grow for an additional 24hrs. DMEM +10µg/ml puromycin was then added to the cells and  
206 they were allowed to grow to confluency. Media was changed daily to remove cell debris.

207 Transient transfection was performed on uncoated glass coverslips or 6 well dishes using 5µg of plasmid along with 30µg  
208 polyethylenimine, linear mw 25,000 (Polysciences 23966-2). Cells were washed with DMEM or DMEM-F12 2-4 hours  
209 after transfection reagent was added (Longo *et al.*, 2013).

### 210 Ciliation

211 For MDCKII 2D cell culture, cells were diluted 1:10 from a nearly confluent plate onto plastic dishes and then allowed to  
212 grow overnight.  $2.5 \times 10^4$  cells were then plated onto transwell filters (Corning 3460) with DMEM on both sides of the  
213 filter. Cells were confluent the day after plating and were allowed to grow for an additional 4-5 days to ciliate. Media

214 was changed every other day. For rescue experiments, cells were transfected in 6 well dishes and expression was  
215 verified prior to moving to transwell filters.

216 MDCKII cyst formation was modified from previous work (Elia and Lippincott-Schwartz, 2009; Hebert *et al.*, 2012). Cells  
217 were diluted 1:10 from a nearly confluent plate onto plastic dishes and then allowed to grow overnight. 8 well cell  
218 chambers (Falcon 08-774-26) were precoated with 85 $\mu$ l collagen solution [24mM glutamine, 2.35 mg/ml NaHCO<sub>3</sub>, 20mM  
219 HEPES (pH 7.6), 1x MEM, 2mg/ml type I collagen (Corning 354249)]. Cells were collected and strained through a 0.4 $\mu$ m  
220 strainer to remove cell clumps. 2.6x10<sup>3</sup> cells were resuspended in 175 $\mu$ l collagen solution and placed in the precoated  
221 cell chambers. 400 $\mu$ l DMEM was add to each chamber after the collagen solidified. DMEM was changed once every  
222 other day for 12-14 days.

223 For IMCD3 cells, 2.5x10<sup>4</sup> cells were plated onto glass coverslips and allowed to grow to confluency. Media was washed  
224 off and replaced with DMEM-F12 without serum for two days.

225 Cilia counts were performed by manually counting all cilia within an image. *sh-daam1* cells tend to pile on top of each  
226 causing automated methods of counting cells to miscount cells. For this reason, we split images up into a 4x4 grid and  
227 manually counted the same four sections in each image (Figure S5).

## 228 **Staining and imaging**

### 229 2D MDCK and IMD3 cell cultures

230 Cells were fixed in 4% PFA in PBS followed by 100mM Glycine. Cells were blocked in 10% goat serum in PTW (PBS+0.1%  
231 TritonX). 1:1000 Phalloidin-Alexa568 (Invitrogen, A12380) was used for staining of F-actin, and 1:1000 4'6'-diamidino-2-  
232 phenylindole were used to detect nuclei. Primary antibody 1:100  $\alpha$ -Tub1a (Sigma -T6793) in combination with secondary  
233 antibody anti-mouse IgG Alexa 647 (Invitrogen, A-21235).

### 234 3D MDCK cultures

235 Staining of MDCK 3D cell cultures was carried out as previously described (Williams et al. 2017). Slides were incubated  
236 with primary 1:1000 mouse  $\alpha$ -Tub1a (Sigma -T6793) antibody and detected with 1:200 anti-rabbit CY3 (Jackson  
237 Immunoreserach, cat# 715-165-151 ) or 1:200 Alexa 488 Mouse (1:200, Jackson Immunoresearch, cat# 715-545-150)

238 secondary antibodies. F-actin was labeled with Alexa Fluor 647 Phalloidin (1:200, Invitrogen, A22287) while nuclei were  
239 detected with 4'6'-diamidino-2-phenylindole (1:500, DAPI). Slides were mounted in Fluoromount-G medium (Southern  
240 Biotech, cat# 0100-01) prior to imaging.

#### 241 *Xenopus* embryos

242 Embryos were staged (Nieuwkoop and Faber, 1994), fixed in MEMFA (DeLay *et al.*, 2016) and immunostained using  
243 established protocols (Hemmati-Brivanlou and Melton, 1994) Primary antibody 1:100 mouse  $\alpha$ -Tub1a (Sigma -T6793),  
244 1:250 rabbit RFP (MBL International -PM005) and 1:250 rabbit Lhx1 (gift from Masanori Taira, (Taira *et al.*, 1992)) were  
245 used. Proximal tubules were stained using fluorescein-coupled Erythrina cristagalli lectin at 50 #g/ml (Vector Labs).  
246 Secondary antibodies anti-mouse IgG Alexa 647 (Invitrogen, A-21235), anti-mouse IgG Alexa 488 (Invitrogen, A-11001)  
247 and anti-rabbit IgG Alexa 555 (Invitrogen, A-21428) were used at 1:500 concentration. Embryos were dehydrated  
248 in methanol and cleared in a benzyl benzoate/benzyl alcohol (2:1) solution for imaging.

#### 249 **Imaging**

250 Images were taken using an Olympus SZX16 fluorescent stereomicroscope and an upright Leica SP5, inverted Nikon A1,  
251 and an inverted Zeiss LSM800 laser scanning confocal microscopes with cell incubation chamber. Nikon-Elements, Zen  
252 blue, ImageJ (Fiji plugin), Adobe Photoshop and Microsoft PowerPoint were used for data analysis and image processing.  
253 For live imaging cell were grown on coverslips and imaged in Attofluor™ Cell Chamber (Thermo A7816).

#### 254 **Western blot**

##### 255 Cell lysates

256 Cells were trypsinized from plates, collected and washed twice in PBS prior to being resuspended in 2X Laemmli (Biorad)  
257 plus 100  $\mu$ M dithiothreitol. The resulting cell lysates were then boiled at 95°C for 30min. Lysates were run on an 8% SDS-  
258 PAGE gel and the protein was then transblotted onto a 0.2  $\mu$ m nitrocellulose membrane (GE Healthcare), followed by  
259 blocking for 3 hours in KPL block (SeraCare) at room temperature. Blots were incubated in 1:1000 rabbit anti-GAPDH  
260 (Santa Cruz sc-25778), 1:1000 rabbit anti-Daam1 (Protein Tech 14876-1-AP) or 1:1000 rabbit anti- $\beta$ -catenin (McCrea *et*  
261 *al.*, 1993) primary antibodies for 1-2hrs. Blots were then washed with TBST, incubated in goat anti-rabbit IgG

262 horseradish peroxidase secondary antibody (1:5000, BioRad) for 2 hours at room temperature and then washed again  
263 with TBST prior to imaging on a BioRad ChemiDoc XRS+ imaging system using enhanced chemiluminescence (Pierce  
264 Supersignal West Pico). Preparation of MDCK cell extracts and western blot analysis presented in Figure 2 were carried  
265 out following the protocol described by (Williams *et al.*, 2017b).

## 266 Embryo lysates

267 1-cell *Xenopus* embryos were injected with 10nl of 20ng Daam1 or Standard morpholino in combination with 0.5 ng  
268 mRFP. Lysates were prepared from Stage 11 embryos and western blots were performed following previously  
269 established protocol (Miller *et al.*, 2011).

## 270 Plasmids

271 pCS2-GFP-Daam1 and pCS2-GFP-Daam1(I698A) constructs were a gift from the Goode lab(Moseley *et al.*, 2006; Lu *et al.*,  
272 2007). A mutation of A2822G was discovered in these plasmids, which resulted in the amino acid change of D941G. This  
273 mutation was corrected using site directed mutagenesis. The pCS2-GFP plasmid was generated by digesting pCS2-GFP-  
274 Cby1 (A gift from the Klymkowski lab) with ClaI – XbaI to remove the *cby1* gene (Shi *et al.*, 2014). The ends were blunted  
275 using phusion DNA polymerase (NEB) followed by ligation and transformation.

276 pCS2-mCherry-Daam1 and pCS2-mCherry-Daam1(I698A) constructs were generated by BamHI-NotI digestion of pCS2-  
277 GFP-Daam1 and pCS2-GFP-Daam1(I698A) and cloned into the same sites of pCS2-GFP-Cby1 replacing the GFP-Cby1 with  
278 Daam1. mCherry was PCR amplified from Cas9-mCherry (Addgene #78313) and cloned into the BamHI site.

279 *sh-daam1* (#1 TTTCAGGAGATAGTATTGTGC, #2 TAACATCAGAAATTCATAGCG, #3 AACAGGTCTTTAGCTTCTGC) and *sh-*  
280 *arhgef19* (TGCTTCTCACTTTCGGTCC) constructs were purchased from GE-Dharmacon. *sh-scrambled* plasmid was used as  
281 a negative control for 2D ciliation experiments. As *sh-daam1* (#1) construct is designed against the human *daam1*, and  
282 perfectly matches the *Canis lupis daam1* however, the target sequence is a two base pairs off of the mouse *daam1*  
283 sequence. Therefore a *sh-daam1 (ms #1)* (TTTTIAGGAGAAAGTATTGTGC) construct was generated to better target *daam1*  
284 in IMCD3 cells. The construct was made by cloning oligos containing a hairpin for the indicated sequence into EcoRI –  
285 AgeI sites of pLKO.1 as described in (Moffat *et al.*, 2006).

## 286 *Xenopus laevis*

287 Wild type oocyte-positive *X. laevis* adults were purchased from Nasco (LM00531MX) and embryos were obtained from  
288 these adults and reared as previously described (DeLay *et al.*, 2018). This protocol was approved by the University of  
289 Texas McGovern Medical School Institutional Animal Care and Use Committee (IACUC) (protocol #: AWC-16-0111).  
290 Microinjections were performed as previously described (Sive *et al.*, 2000; DeLay *et al.*, 2016). 10 nL of injection mix was  
291 injected into the indicated blastomere. For morpholino injections, 20 ng of Daam1 morpholino  
292 (5' GCCGCAGGTCTGTCAGTTGCTTCTA 3') (Miller *et al.*, 2011; Corkins *et al.*, 2018) or Standard morpholino (5'  
293 CCTTTACCTCAGTTACAATTTATA 3') were injected along with 500 pg of membrane targeted RFP RNA as a tracer to mark  
294 targeted cells into the V2 blastomere at the 8-cell stage to target the kidney (Moody, 1987).

## 295 FOOTNOTES

### 296 Acknowledgements:

297 We appreciate the helpful suggestions and advice throughout this project from the members of the laboratories of R.K.  
298 Miller, A.B. Gladden, P.D. McCrea, as well as M. Kloc, especially to Bridget D. Delay critical evaluation of this manuscript.  
299 We thank the animal care technicians and veterinarians, including J.C. Whitney and T.H. Gomez who took care of the  
300 animals even during Hurricane Harvey. For imaging support, we thank the Department of Pediatrics imaging core  
301 supported by the Office of the President of Academic Affairs, as well as Adriana Paulucci and the MD Anderson Genetics  
302 Imaging Core. We thank all of the labs that provided plasmids for this project. pCS2-GFP-Cby1 was a gift from Mike  
303 Klymkowsky (University of Colorado Boulder), and pCS2-GFP-Daam1 and pCS2-GFP-Daam1(I698A) were a gifts from  
304 Raymond Habas (Temple University) and Bruce L. Goode (Brandeis University), respectively. pCS10R-IFT88 was a gift  
305 from John Wallingford. We also thank Masanori Taira for Lhx1 antibody.

306 These studies were supported by the National Kidney Foundation (FLB1628 to R.K.M.), National Institutes of Health (NIH)  
307 grants (K01DK092320 and R03DK118771 to R.K.M.), and startup funding from the Department of Pediatrics, Pediatric  
308 Research Center at UTHealth McGovern Medical School (to R.K.M.).

### 309 Authorship contributions

310 M.E.C, V.K.S., R.K.M, and A.B.G generated *sh-daam1* cells and performed 2D cilia experiments. A.B.G., V.K.S. and M.E.C.  
311 preformed 3D cyst experiments. V.K.S. and M.E.C. generated plasmids for viral infections, GFP-Daam1 and GFP-  
312 Daam1(I698A) plasmids for transient transfections and wrote the manuscript. M.E.C generated mCherry-Daam1 and  
313 mCherry-Daam1(I698A) plasmids for transient transfections and performed experiments to generate figures 1,3,4,5, S1,  
314 S2, and S5. V.K.S and R.K.M. performed experiments for *X. laevis* kidney experiments. V.K.S. generated data for figures 2,  
315 6, S3, and S4. R.K.M., M.K. and V.K.S. performed experiments for Daam1 morpholino knockdown in *X. laevis* skin. P.D.M.  
316 facilitated the initiation of this project. A.B.G helped set up mammalian cell culture and all cell culture techniques,  
317 oversaw experiments performed in cell culture. R.K.M. conceived of the project and performed preliminary experiments.  
318 All authors have provided critical feedback in the writing of the manuscript.

### 319 Citations

320 Alberts, A. S. (2001). Identification of a Carboxyl-terminal Diaphanous-related Formin Homology Protein  
321 Autoregulatory Domain. *J. Biol. Chem.*

322 Ang, S. F., Zhao, Z. S., Lim, L., and Manser, E. (2010). DAAM1 is a formin required for centrosome re-  
323 orientation during cell migration. *PLoS One.*

324 Arts, H. H., and Knoers, N. V. A. M. (2013). Current insights into renal ciliopathies: What can genetics teach us?  
325 *Pediatr. Nephrol.* 28, 863–874.

326 Baek, J. I., Kwon, S. H., Zuo, X., Choi, S. Y., Kim, S. H., and Lipschutz, J. H. (2016). Dynamin binding protein  
327 (Tuba) deficiency inhibits ciliogenesis and nephrogenesis in Vitro and in Vivo. *J. Biol. Chem.*

328 Bryant, D. M., Datta, A., Rodríguez-Fraticelli, A. E., PeräCurrency Signnen, J., Martín-Belmonte, F., and Mostov,  
329 K. E. (2010). A molecular network for de novo generation of the apical surface and lumen. *Nat. Cell*  
330 *Biol.*

331 Copeland, S. J., McRae, A., Guarguaglini, G., Trinkle-Mulcahy, L., and Copeland, J. W. (2018). Actin-dependent  
332 regulation of cilia length by the inverted formin FHDC1. *Mol. Biol. Cell* 29, 1611–1627.

333 Corbit, K. C., Shyer, A. E., Dowdle, W. E., Gaulden, J., Singla, V., and Reiter, J. F. (2008). Kif3a constrains  $\beta$ -  
334 catenin-dependent Wnt signalling through dual ciliary and non-ciliary mechanisms. *Nat. Cell Biol.*

- 335 Corkins, M. E., Hanania, H. L., Krneta-Stankic, V., Delay, B. D., Pearl, E. J., Lee, M., Ji, H., Davidson, A. J., Horb,  
336 M. E., and Miller, R. K. (2018). Transgenic *Xenopus laevis* line for in vivo labeling of nephrons within the  
337 kidney. *Genes (Basel)*. 9.
- 338 DeLay, B. D., Corkins, M. E., Hanania, H. L., Salanga, M., Deng, J. M., Sudou, N., Taira, M., Horb, M. E., and  
339 Miller, R. K. (2018). Tissue-Specific Gene Inactivation in *Xenopus laevis*: Knockout of *lhx1* in the Kidney  
340 with CRISPR/Cas9. *Genetics* 208, 673–686.
- 341 DeLay, B. D., Krneta-Stankic, V., and Miller, R. K. (2016). Technique to Target Microinjection to the Developing  
342 *Xenopus* Kidney. *J. Vis. Exp.* 111.
- 343 Ding, J., Shao, L., Yao, Y., Tong, X., Liu, H., Yue, S., Xie, L., and Cheng, S. Y. (2017). DGK $\delta$  triggers endoplasmic  
344 reticulum release of IFT88-containing vesicles destined for the assembly of primary cilia. *Sci. Rep.* 7,  
345 5296.
- 346 Drummond, M. L., Li, M., Tarapore, E., Nguyen, T. T. L., Barouni, B. J., Cruz, S., Tan, K. C., Oro, A. E., and  
347 Atwood, S. X. (2018). Actin polymerization controls cilia-mediated signaling. *J. Cell Biol.* 217, 3255–  
348 3266.
- 349 Elia, N., and Lippincott-Schwartz, J. (2009). Culturing MDCK cells in three dimensions for analyzing intracellular  
350 dynamics. *Curr Protoc Cell Biol Chapter 4*, Unit 4 22.
- 351 Habas, R., Kato, Y., and He, X. (2001). Wnt/Frizzled activation of Rho regulates vertebrate gastrulation and  
352 requires a novel formin homology protein Daam1. *Cell* 107, 843–854.
- 353 Hebert, A. M., DuBoff, B., Casaletto, J. B., Gladden, A. B., and McClatchey, A. I. (2012). Merlin/ERM proteins  
354 establish cortical asymmetry and centrosome position. *Genes Dev.* 26, 2709–2723.
- 355 Hemmati-Brivanlou, A., and Melton, D. A. (1994). Inhibition of activin receptor signaling promotes  
356 neuralization in *Xenopus*. *Cell*.
- 357 Hoffmann, A. K., Naj, X., and Linder, S. (2014). Daam1 is a regulator of filopodia formation and phagocytic  
358 uptake of *Borrelia burgdorferi* by primary human macrophages. *FASEB J.*
- 359 Kida, Y. S., Sato, T., Miyasaka, K. Y., Suto, A., and Ogura, T. (2007). Daam1 regulates the endocytosis of EphB

- 360 during the convergent extension of the zebrafish notochord. Proc. Natl. Acad. Sci.
- 361 Lee, J. E., and Gleeson, J. G. (2011). A systems-biology approach to understanding the ciliopathy disorders.
- 362 Genome Med.
- 363 Lee, Y. L., Sante, J., Comerci, C. J., Cyge, B., Menezes, L. F., Li, F.-Q., Germino, G. G., Moerner, W. E., Takemaru,
- 364 K.-I., and Stearns, T. (2014). Cby1 promotes Ahi1 recruitment to a ring-shaped domain at the centriole-
- 365 cilium interface and facilitates proper cilium formation and function. Mol. Biol. Cell.
- 366 Liu, W., Sato, A., Khadka, D., Bharti, R., Diaz, H., Runnels, L. W., and Habas, R. (2008). Mechanism of activation
- 367 of the Formin protein Daam1. Proc. Natl. Acad. Sci. *105*, 210–215.
- 368 Longo, P. A., Kavran, J. M., Kim, M. S., and Leahy, D. J. (2013). Transient mammalian cell transfection with
- 369 polyethylenimine (PEI). Methods Enzymol. *529*, 227–240.
- 370 Lu, J., Meng, W., Poy, F., Maiti, S., Goode, B. L., and Eck, M. J. (2007). Structure of the FH2 domain of Daam1:
- 371 implications for formin regulation of actin assembly. J Mol Biol *369*, 1258–1269.
- 372 Luo, W., Lieu, Z. Z., Manser, E., Bershadsky, A. D., and Sheetz, M. P. (2016). Formin DAAM1 organizes actin
- 373 filaments in the cytoplasmic nodal actin network. PLoS One.
- 374 McCrea, P. D., Briehner, W. M., and Gumbiner, B. M. (1993). Induction of a secondary body axis in *Xenopus* by
- 375 antibodies to  $\beta$ -catenin. J. Cell Biol.
- 376 McMurray, R. J., Wann, A. K. T., Thompson, C. L., Connelly, J. T., and Knight, M. M. (2013). Surface topography
- 377 regulates wnt signaling through control of primary cilia structure in mesenchymal stem cells. Sci. Rep.
- 378 Mick, D. U., Rodrigues, R. B., Leib, R. D., Adams, C. M., Chien, A. S., Gygi, S. P., and Nachury, M. V (2015).
- 379 Proteomics of Primary Cilia by Proximity Labeling. Dev Cell *35*, 497–512.
- 380 Miller, R. K., Canny, S. G., Jang, C. W., Cho, K., Ji, H., Wagner, D. S., Jones, E. A., Habas, R., and McCrea, P. D.
- 381 (2011). Pronephric tubulogenesis requires Daam1-mediated planar cell polarity signaling. J Am Soc
- 382 Nephrol *22*, 1654–1664.
- 383 Moffat, J. *et al.* (2006). A Lentiviral RNAi Library for Human and Mouse Genes Applied to an Arrayed Viral High-
- 384 Content Screen. Cell *124*, 1283–1298.



- 385 Moody, S. A. (1987). Fates of the blastomeres of the 32-cell-stage *Xenopus* embryo. *Dev Biol* 122, 300–319.
- 386 Moseley, J. B., Maiti, S., and Goode, B. L. (2006). Formin proteins: Purification and measurement of effects on  
387 actin assembly. *Methods Enzymol*.
- 388 Moyer, J. H., Lee-Tischler, M. J., Kwon, H. Y., Schrick, J. J., Avner, E. D., Sweeney, W. E., Godfrey, V. L., Cacheiro,  
389 N. L. A., Wilkinson, J. E., and Woychik, R. P. (1994). Candidate gene associated with a mutation causing  
390 recessive polycystic kidney disease in mice. *Science* (80-. ). 264, 1329–1333.
- 391 Nieuwkoop, P. D., and Faber, J. (1994). Normal Table of *Xenopus Laevis* (Daudin): a Systematical and  
392 Chronological Survey of the Development from the Fertilized Egg Till the End of Metamorphosis  
393 (Paperback): Taylor Francis Inc, United States 9780815318965 Paperback - The Book Depository, NY:  
394 Garland Publishing, Inc.
- 395 O'Brien, L. E., Jou, T. S., Pollack, A. L., Zhang, Q., Hansen, S. H., Yurchenco, P., and Mostov, K. E. (2001). Rac1  
396 orientates epithelial apical polarity through effects on basolateral laminin assembly. *Nat. Cell Biol*.
- 397 Onuchic, L. F., Schrick, J. J., Ma, J., Hudson, T., Guay-Woodford, L. M., Zerres, K., Woychik, R. P., and Reeders,  
398 S. T. (1995). Sequence analysis of the human hTg737 gene and its polymorphic sites in patients with  
399 autosomal recessive polycystic kidney disease. *Mamm Genome* 6, 805–808.
- 400 Park, T. J., Mitchell, B. J., Abitua, P. B., Kintner, C., and Wallingford, J. B. (2008). Dishevelled controls apical  
401 docking and planar polarization of basal bodies in ciliated epithelial cells. *Nat. Genet.* 40, 871–879.
- 402 Satir, P., Pedersen, L. B., and Christensen, S. T. (2010). The primary cilium at a glance. *J. Cell Sci*.
- 403 Shi, J., Zhao, Y., Galati, D., Winey, M., and Klymkowsky, M. W. (2014). Chibby functions in *Xenopus* ciliary  
404 assembly, embryonic development, and the regulation of gene expression. *Dev. Biol.* 395, 287–298.
- 405 Sive, H. L., Grainger, R. M., and Harland, R. M. (2000). *Early Development of Xenopus Laevis: A Laboratory*  
406 *Manual*, Cold Spring Harbor Press, Cold Spring Harbor, NY, USA.
- 407 Steere, N., Chae, V., Burke, M., Li, F. Q., Takemaru, K. I., and Kuriyama, R. (2012). A Wnt/beta-catenin pathway  
408 antagonist Chibby binds Cenexin at the distal end of mother centrioles and functions in primary cilia  
409 formation. *PLoS One*.

- 410 Taira, M., Jamrich, M., Good, P. J., and Dawid, I. B. (1992). The LIM domain-containing homeo box gene *Xlim-1*  
411 is expressed specifically in the organizer region of *Xenopus* gastrula embryos. *Genes Dev.*
- 412 Tanegashima, K., Zhao, H., and Dawid, I. B. (2008). WGEF activates Rho in the Wnt-PCP pathway and controls  
413 convergent extension in *Xenopus* gastrulation. *EMBO J.*
- 414 Wang, Y. *et al.* (2004). WGEF is a novel RhoGEF expressed in intestine, liver, heart, and kidney. *Biochem.*  
415 *Biophys. Res. Commun.*
- 416 Werner, M. E., Hwang, P., Huisman, F., Taborek, P., Yu, C. C., and Mitchell, B. J. (2011). Actin and microtubules  
417 drive differential aspects of planar cell polarity in multiciliated cells. *J. Cell Biol.*
- 418 Williams, E., Villar-Prados, A., Bowser, J., Broaddus, R., and Gladden, A. B. (2017). Loss of polarity alters  
419 proliferation and differentiation in low-grade endometrial cancers by disrupting Notch signaling. *PLoS*  
420 *One* 12, e0189081.
- 421 Yasunaga, T. *et al.* (2015). The polarity protein inturnd links NPHP4 to Daam1 to control the subapical actin  
422 network in multiciliated cells. *J. Cell Biol.*
- 423 Yoder, B. K., Tousson, A., Millican, L., Wu, J. H., Bugg, C. E., Schafer, J. A., and Balkovetz, D. F. (2002). Polaris, a  
424 protein disrupted in *orpk* mutant mice, is required for assembly of renal cilium. *Am. J. Physiol. - Ren.*  
425 *Physiol.* 282, F541–F552.
- 426 Zhu, P., Xu, X., and Lin, X. (2015). Both ciliary and non-ciliary functions of *Foxj1a* confer Wnt/  $\beta$ -catenin  
427 signaling in zebrafish left-right patterning. *Biol. Open* 4, 1376–1386.

428

429

430 **Figure 1: Daam1 knockdown results in a loss of primary cilia in MDCKII cells. A)** Diagram illustrating the domains within  
431 the Daam1 protein. The GBD(DiaphanousGTPase-binding Domain) FH3(Diaphanous FH3 Domain) FH1(Formin Homology  
432 1) FH2(Formin Homology 2) and DAD(Diaphanous Auto-regulatory Domain) are indicated. The location of the I698A  
433 mutation within the formin homology 2 domain (FH2) is marked with a red line, and positions corresponding to the  
434 shRNAs are marked with a blue line. MDCKII canine kidney epithelial cells were infected with either *sh-daam1* or a  
435 control construct and grown upon transwell filters. **B)** Cells were stained with acetylated  $\alpha$ -Tubulin antibody (acTubulin)  
436 to visualize primary cilia (green), DAPI to label nuclei (blue), and phalloidin to label F-actin (red). Confocal imaging was  
437 used to analyze the effect of Daam1 depletion on primary ciliogenesis. Scale bars equal to 50  $\mu$ m. **C)** Cilia were  
438 quantified. Error bars are shown as  $\pm$  SEM. **D)** Cell numbers were quantified as described in Figure S5. Error bars are  
439 shown as  $\pm$  SEM. **E)** Western blot of *sh-daam1* MDCKII cell lysates showing depletion of Daam1 protein levels.  $\beta$ -catenin  
440 was used as a loading control. \* indicates  $p < 0.05$  as compared to *sh-scrambled*.

441 **Figure 2: *sh-daam1* depleted MDCKII cells show reduced luminal ciliogenesis in 3D cultures.** Control and *sh-daam1*-  
442 depleted cells were cultured in collagen I matrix to form cysts. After 12-14 days in culture, cysts were fixed and stained  
443 with an antibody against acetylated  $\alpha$ -Tubulin (acTubulin) to visualize primary cilia (green), phalloidin for F-actin  
444 (magenta) and DAPI for nuclei (blue). Using confocal imaging we analyzed the effect of Daam1 depletion on ciliogenesis.  
445 **(A)** Representative merged confocal images showing reduction of luminal cilia upon Daam1 knockdown. White arrow  
446 points to luminal cilia in control cysts. Scale bars equal to 10  $\mu$ m. **(B)** The graph shows quantification of cysts with  
447 luminal cilia for each condition. Twenty randomly chosen cyst per sample were analyzed in three independent  
448 experiments. Error bars are shown as  $\pm$  SEM; Significance was calculated using unpaired, two-tailed t-test; ns indicates  
449  $p > 0.05$ , \* indicates  $p < 0.05$ , \*\* $p < 0.01$  **(C)** Western blot showing Daam1 protein levels in wild-type (control) cells and in  
450 cells expressing different shRNAs targeting Daam1. GAPDH was used as loading control.

451 **Figure 3: The *sh-daam1* cilia phenotype can be rescued with wild-type Daam1 but not Daam1(I698A).** Stable MDCKII  
452 cells infected with either *sh-daam1* or a control *sh-scrambled* construct were transiently transfected with constructs that  
453 express either GFP, GFP-Daam1, or GFP-Daam1(I698A) constructs. Cells were grown on transwell filters and stained with  
454 acetylated  $\alpha$ -Tubulin antibody (acTubulin) to label primary cilia (green), DAPI to label nuclei (blue), and phalloidin to

455 label F-actin (red). Confocal imaging was used to analyze the effects upon primary ciliogenesis. Scale bars equal to 50  
456  $\mu\text{m}$ .

457 **Figure 4: Daam1 localizes to vesicles that carry ciliary components. A)** MDCKII cells were co-transfected with constructs  
458 that express mCherry-Daam1 and GFP-Daam1(I698A) then imaged via confocal to analyze the localization in live cells. **B)**  
459 MDCKII cells were co-transfected with constructs that express mCherry-Daam1 and IFT88-GFP than imaged via confocal  
460 in live cells to determine the subcellular localization. Scale bars equal to 10  $\mu\text{m}$ .

461 **Figure 5: Arhgef19 knockdown results in loss of primary cilia in MDCKII cells. A)** Diagram of the domains within the  
462 Arhgef19 (WGEF) protein. The corresponding position of the shRNA is marked with a blue line. **B)** MDCKII cells were  
463 infected with either a control construct or a construct that targets Arhgef19 and then polarized on transwell filters. Cells  
464 were stained with acetylated  $\alpha$ -Tubulin antibody (acTubulin) to visualize primary cilia (green), DAPI to label nuclei (blue),  
465 and phalloidin to label F-actin (red). Confocal imaging was used to analyze the effects Arhgef19 depletion upon primary  
466 ciliogenesis. Scale bars equal to 50  $\mu\text{m}$ . **C)** The number of cilia was measured, and cell numbers were quantified as  
467 described in Figure S5. \* indicates  $p < 0.05$  as compared to *sh-scrambled*. Error bars are shown as  $\pm$  SEM.

468

469 **Figure 6: Daam1-depletion does not cause absence of cilia within *Xenopus* embryonic kidneys.** Because knockdown of  
470 Daam1 in *Xenopus* kidney leads to kidney defects, we analyzed the effect of Daam1 knockdown on renal ciliogenesis. We  
471 injected Daam1 or Standard (Control) morpholino in combination with a membrane-tagged red fluorescent protein  
472 (mRFP) mRNA as a lineage tracer, into a *Xenopus* blastomere fated to the nephric anlagen. Embryos were fixed at stage  
473 39-40 and stained with an antibody against acetylated  $\alpha$ -Tubulin (acTubulin) to label cilia (green), anti-mRFP lineage  
474 tracer (red) and lectin to label the proximal tubule (blue). **(A)** Stereoscope brightfield imaging shows the gross  
475 morphology of Control and Daam1-morpholino injected embryos. Confocal fluorescent imaging of boxed regions (green)  
476 shows magnified views of corresponding kidneys. Kidney tubules displaying primary cilia are outlined in white. Neurons  
477 (n), multiciliated epidermal cells (mcc) and multiciliated cells within nephrostomes (ns) are immunostained with  
478 acetylated  $\alpha$ -Tubulin (acTubulin) antibody. Scale bars equal to 20  $\mu\text{m}$ . **(B)** The graph represents the percentage of  
479 Control (n=27) and Daam1-depleted (n=26) kidneys with primary cilia. **(C)** Western blot showing Daam1 protein  
480 expression levels in wild-type, control and Daam1 morphant embryos.

481

482 **Figure S1: Loss of Daam1 results in a reduction of primary cilia and mCherry-Daam1 localizes to vesicles carrying IFT88**

483 **in IMCD3 cells.** Murine inner medullary collecting duct (IMCD3) were infected with either *sh-daam1* or a control  
484 construct then ciliated on glass coverslips. **A)** Cells were stained with acetylated  $\alpha$ -Tubulin antibody (acTubulin) to label  
485 primary cilia (green), DAPI to label nuclei (blue), and phalloidin to label F-actin (red). Confocal imaging was used to  
486 analyze the effects Daam1 depletion upon primary ciliogenesis. Scale bars equal to 20  $\mu$ m. **B)** Western blot of *sh-daam1*  
487 IMCD3 cell lysates showing depletion of Daam1 protein levels. GAPDH was used as a loading control. **C)** Cells were co-  
488 transfected with constructs that express mCherry-Daam1 and IFT88-GFP than imaged in live cells. Scale bars equal to 10  
489  $\mu$ m.

490 **Figure S2: Phenotypes derived from control and *sh-daam1* knockdown.**

491 Daam1-depleted 3D MDCKII cyst were scored for the presence of (1) non-luminal cilia – cilia that do not protrude into  
492 central lumen, (2) multiple lumens and (3) hollow lumens-luminal clearance. Twenty cysts were randomly selected for  
493 analysis in three independent experiments. **(A)** The graph indicates the relative percentage of cyst for each phenotype.  
494 Error bars are shown as  $\pm$  SEM; Significance was calculated using unpaired, two-tailed t-test; ns indicates  $p > 0.05$ , \*  
495 indicates  $p < 0.05$ , \*\* $p < 0.01$  **(B)** Representative images of cysts with non-luminal cilia phenotype. In Daam1 depleted  
496 cysts, white arrows point at cilia protruding out into extracellular matrix. Scale bars equal to 10  $\mu$ m.

497

498 **Figure S3: Daam1 does not localize to the primary cilia in IMCD3 cells.** Murine inner medullary collecting duct (IMCD3)

499 cells were transfected with mCherry-Daam1 along with either Cby1-GFP or  $\alpha$ -Tubulin-GFP. Cells were grown to  
500 confluency and serum starved to ciliate. Then cells were analyzed via confocal for colocalization of Daam1 and these  
501 ciliary markers. White boxes outline transition zone in Cby images and cilia in  $\alpha$ -Tubulin images. Scale bars equal to 10  
502  $\mu$ m.

503 **Figure S4: Daam1-depletion does not lead to the absence of cilia during development of *Xenopus* embryonic kidneys.**

504 To further analyze the effect of Daam1 depletion on ciliogenesis, we fixed 8-cell Daam1 and Standard (control)  
505 morpholino injected embryos during early stages of kidney morphogenesis (stage 30). mRFP mRNA was used as a  
506 lineage tracer and coinjected with morpholinos. Stage 30- fixed embryos were immunostained with an antibody against

507 anti-mRFP to visualize tracer (red) together with an Lhx1 antibody to label nephric progenitor cells (blue) and acetylated  
508  $\alpha$ -Tubulin antibody to label primary cilia (green). Subsequently, embryos were analyzed using a confocal laser-scanning  
509 microscope and representative maximum projections of Z-stack sections are shown. Acetylated  $\alpha$ -Tubulin antibody also  
510 stains neurons (n) and multiciliated epidermal cells (mcc). Scale bar is equal to 50  $\mu$ m.

511

512 **Figure S5: Diagram demonstrating the methodology used to count number of cells.** To obtain an unbiased quantitation  
513 of cell numbers in MDCKII depletion experiments (Figures 1 and 5), DAPI images were divided into a 4x4 grid and cells  
514 were counted within the 4 cells along the diagonal from the upper left to the lower right of the image and the number of  
515 cells was averaged. This number was multiplied by 16 to obtain the approximate number of cells per image.

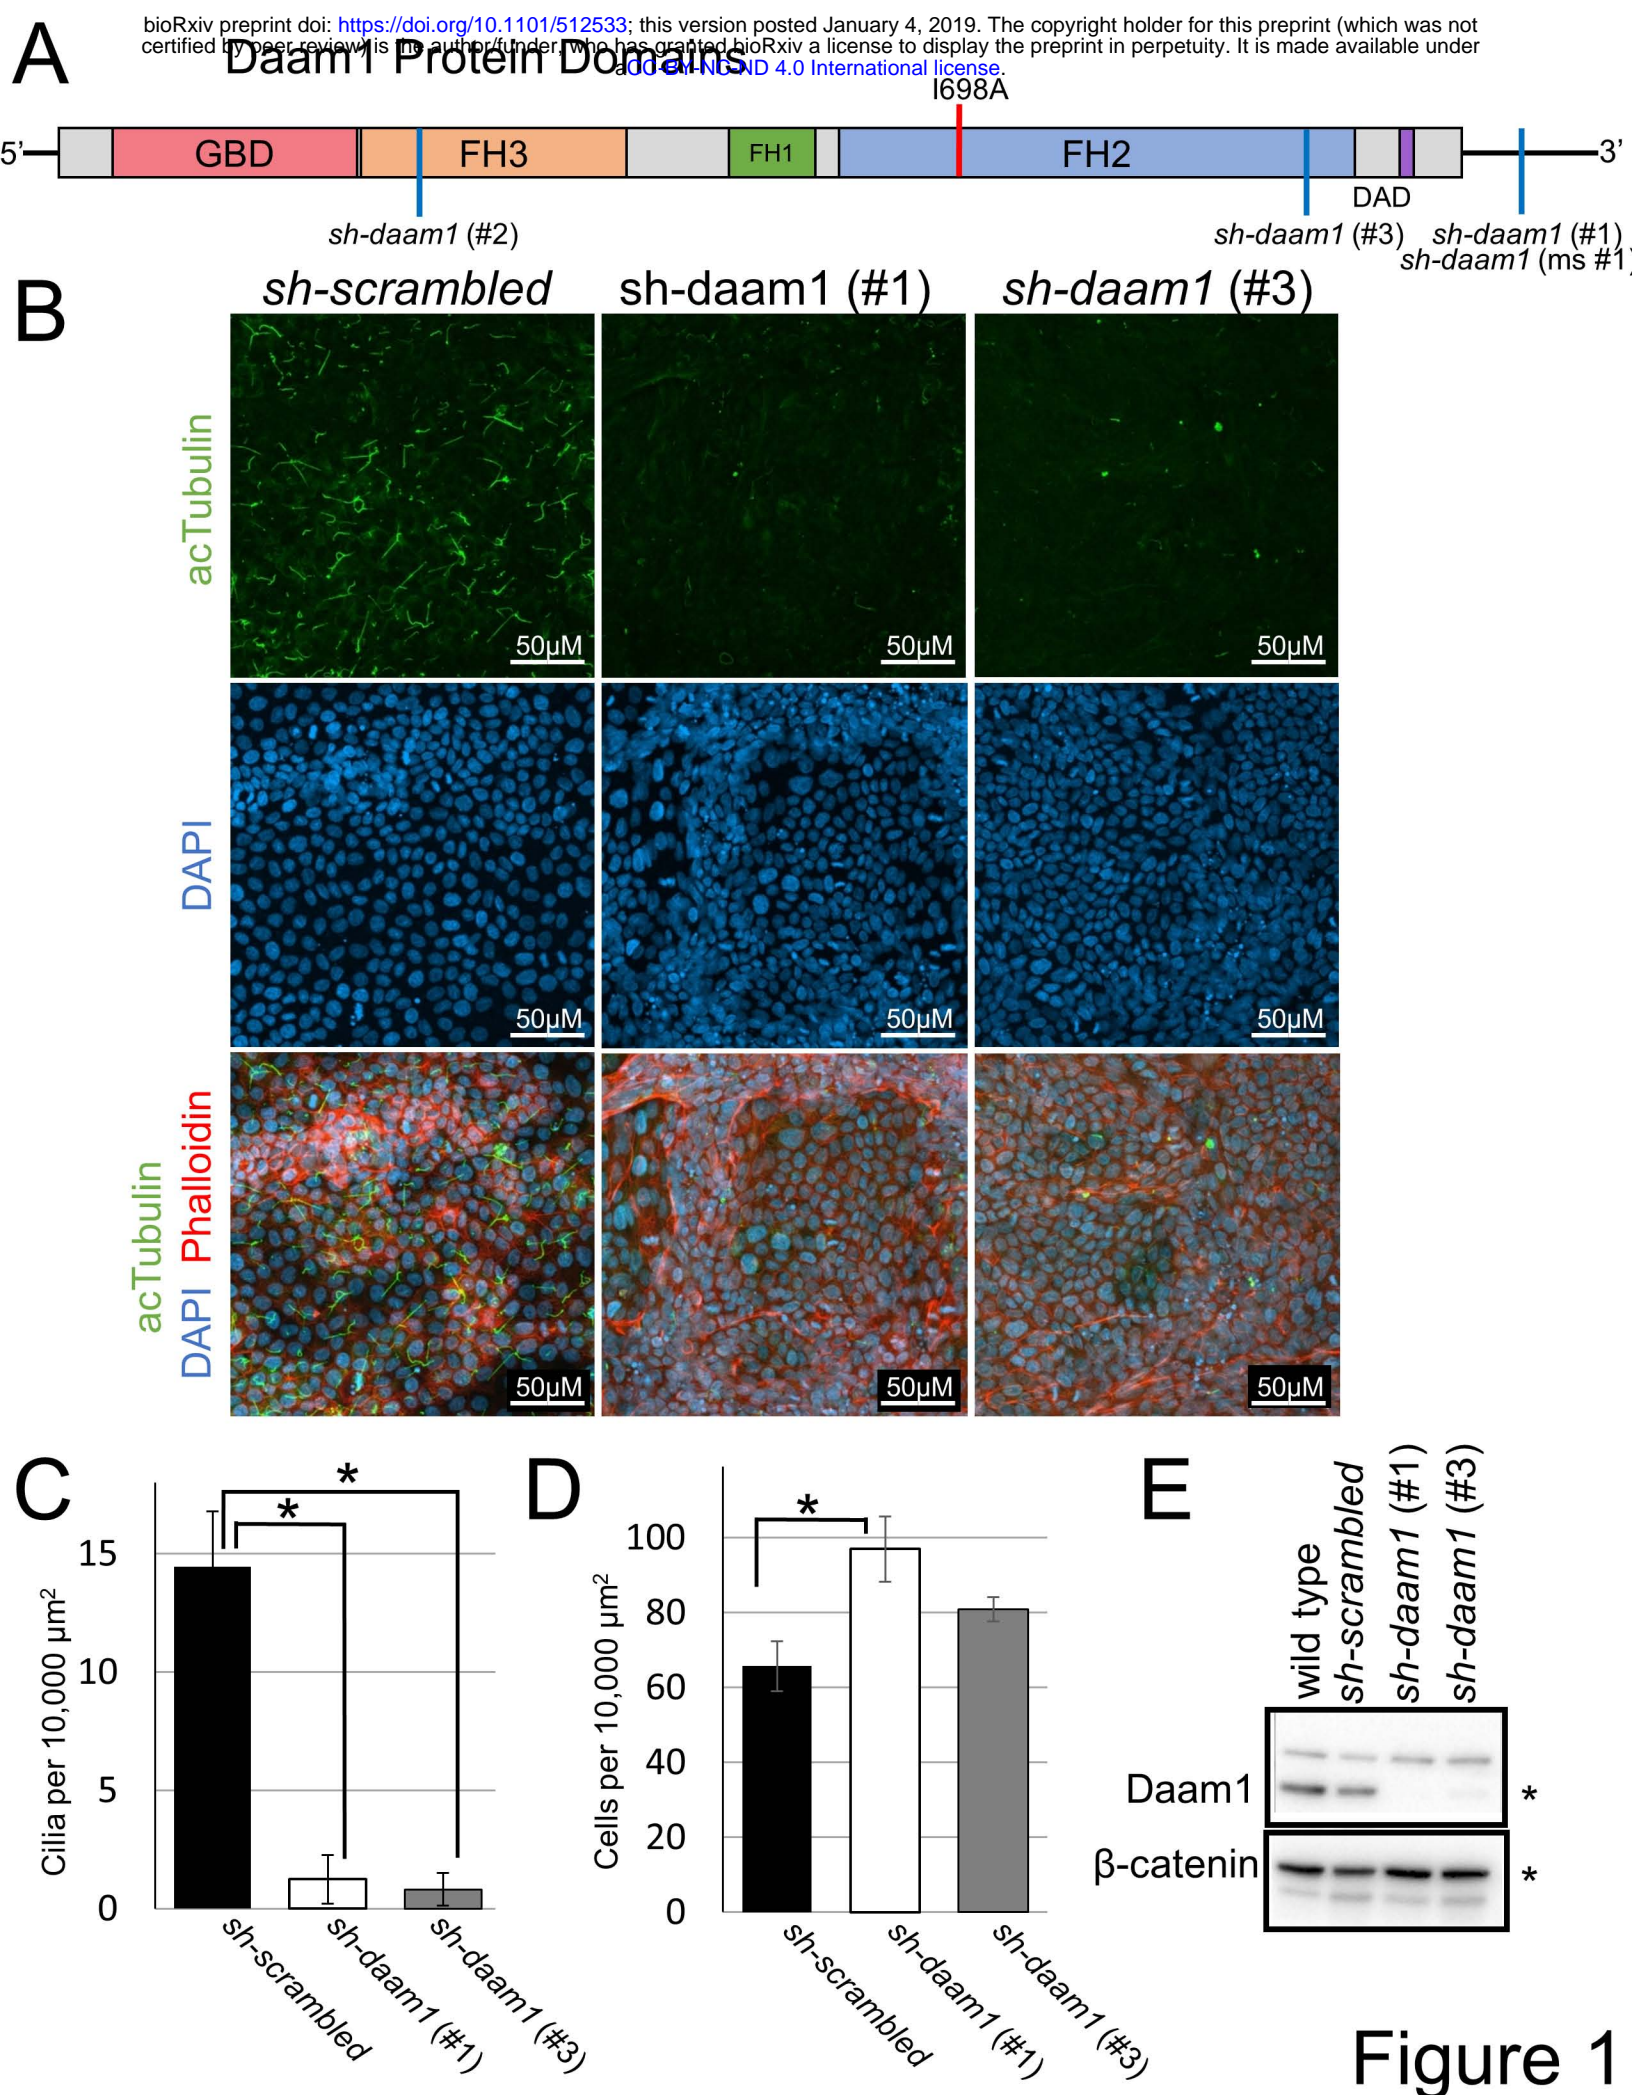

Figure 1

*sh-daam1*

**A**

wild type control

*sh-daam1* (#1)

*sh-daam1* (#3)

acTubulin DAPI Phalloidin

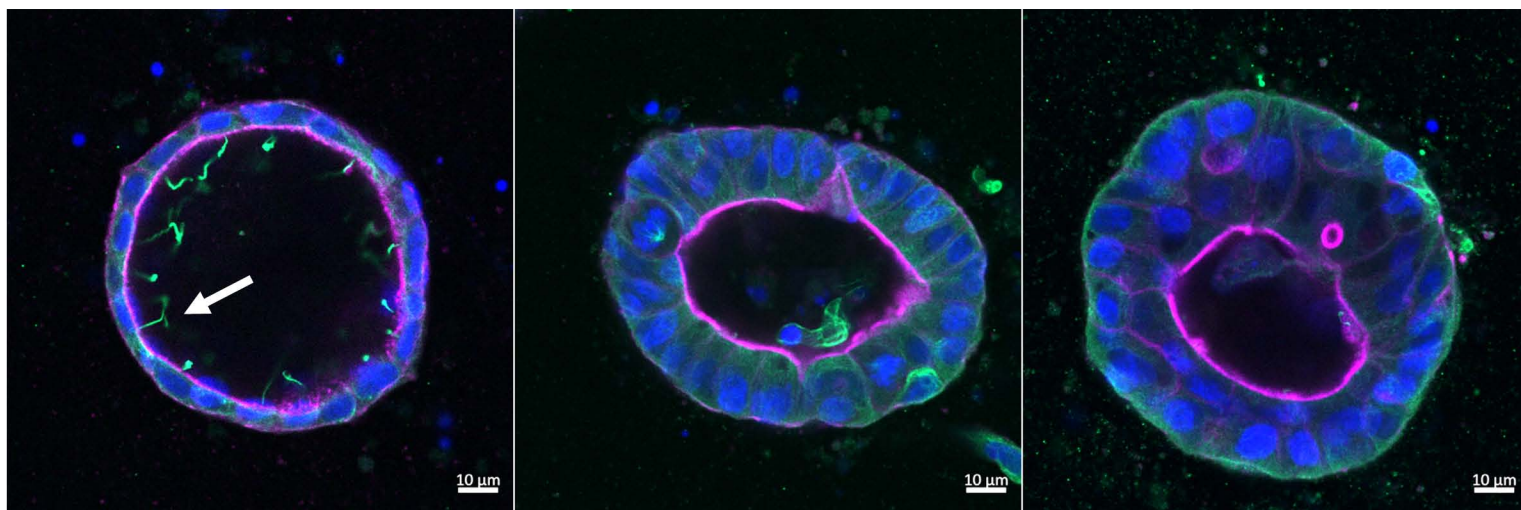

**B**

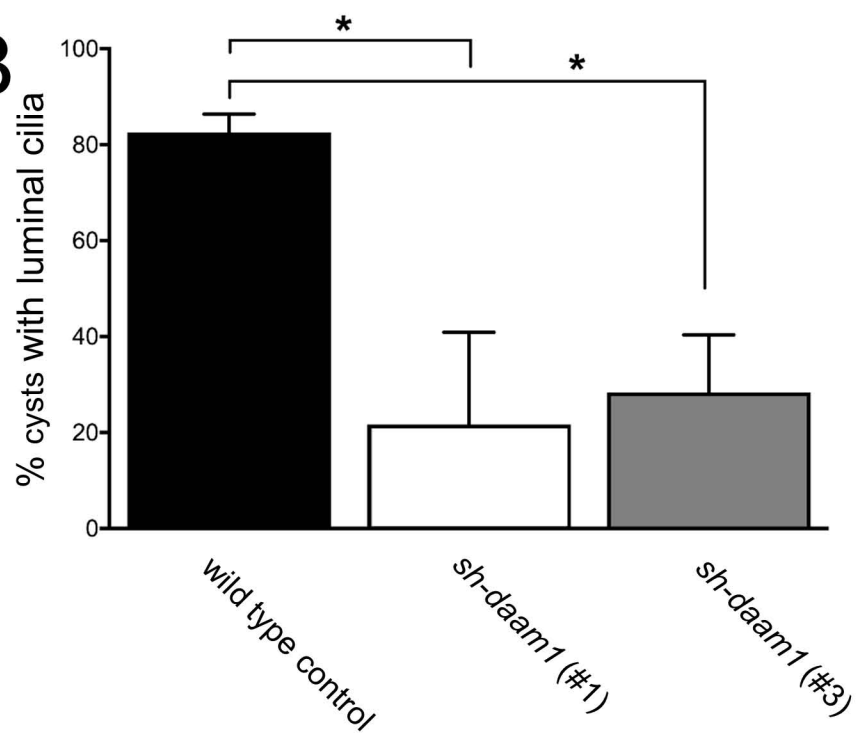

**C**

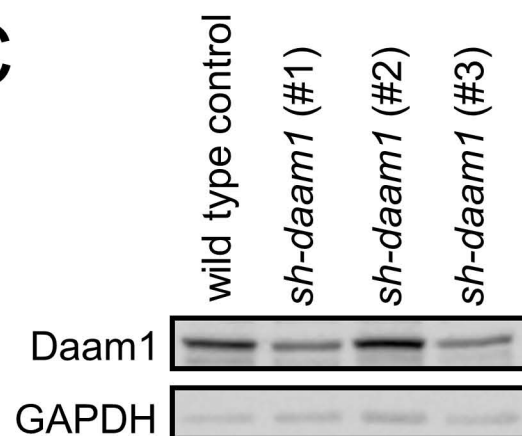

Figure 2



*sh-scrambled*

*sh-daam1* (#1)

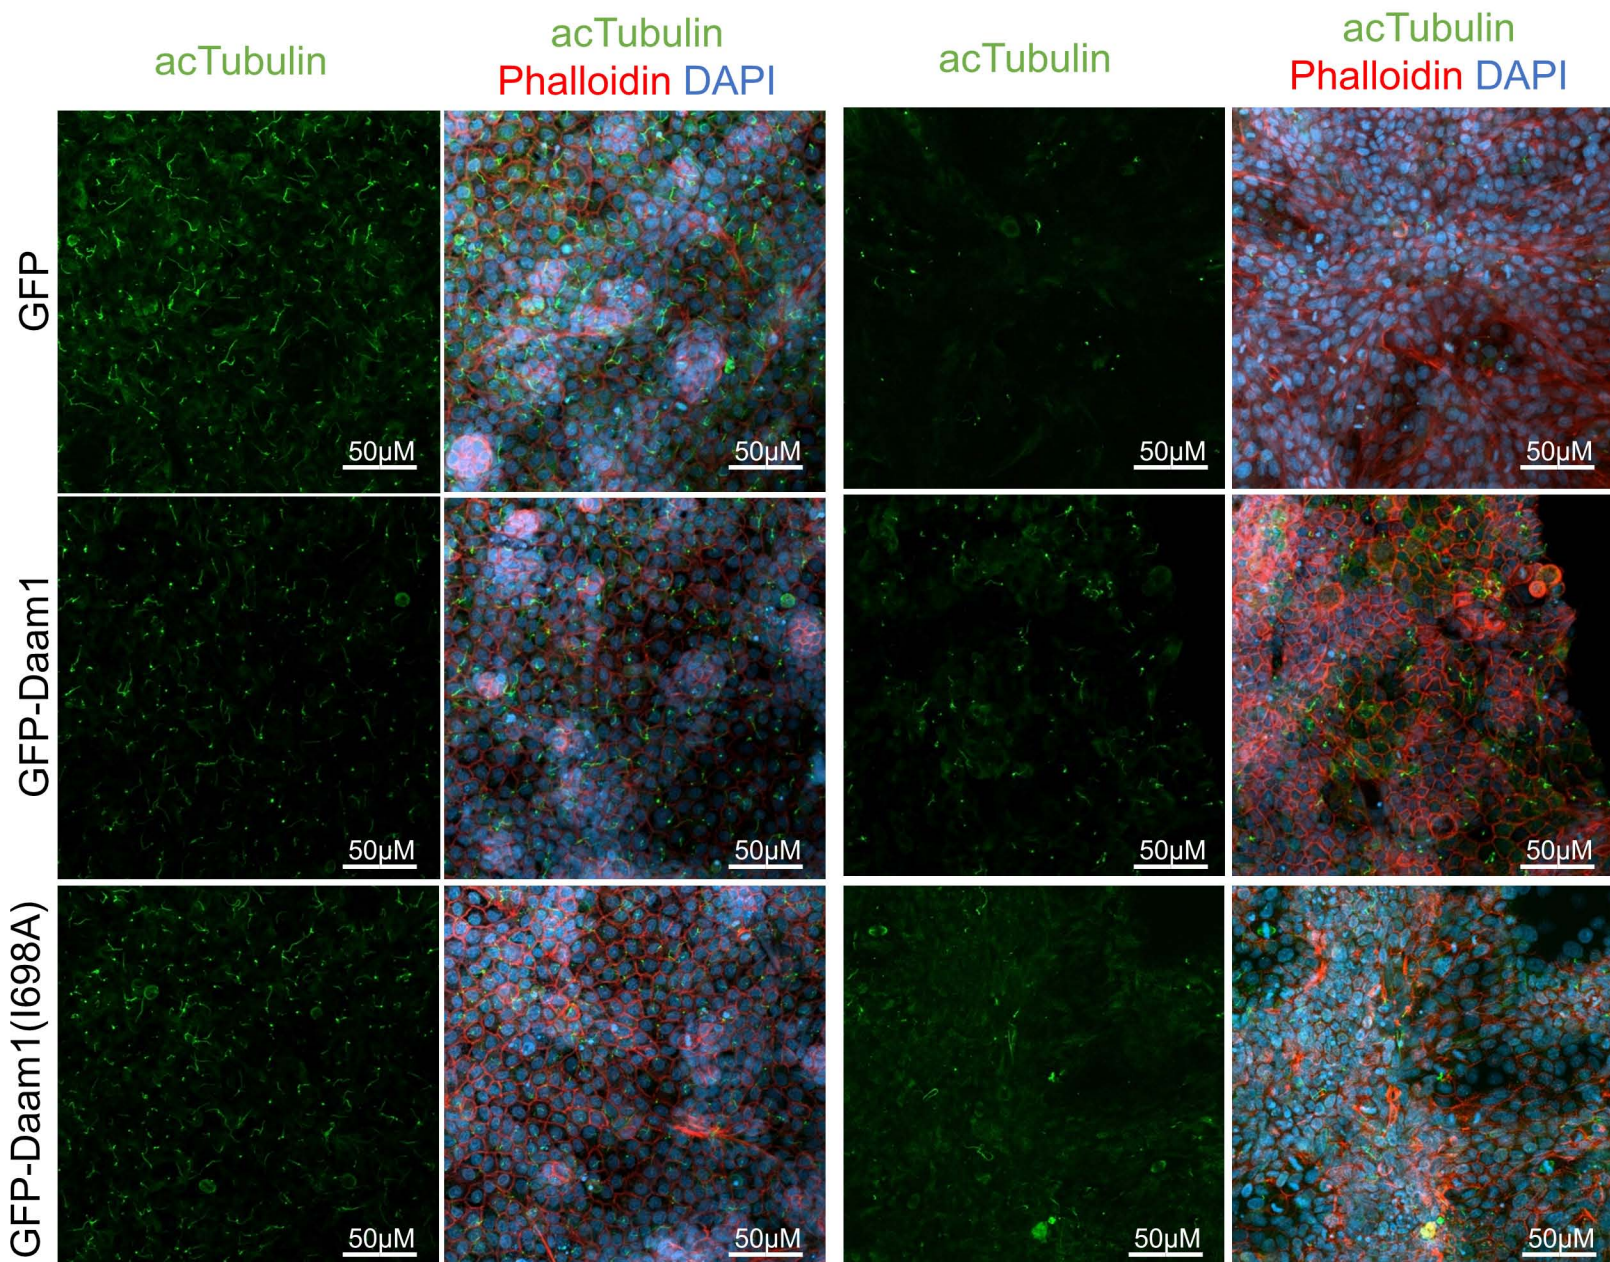

Figure 3

**A**

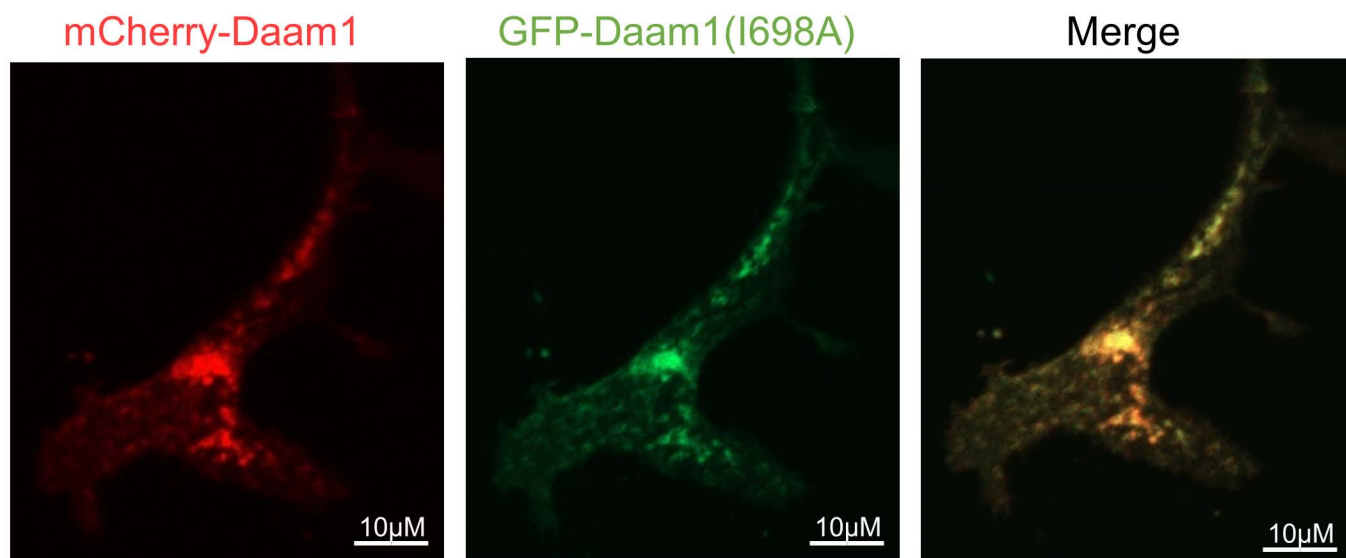

**B**

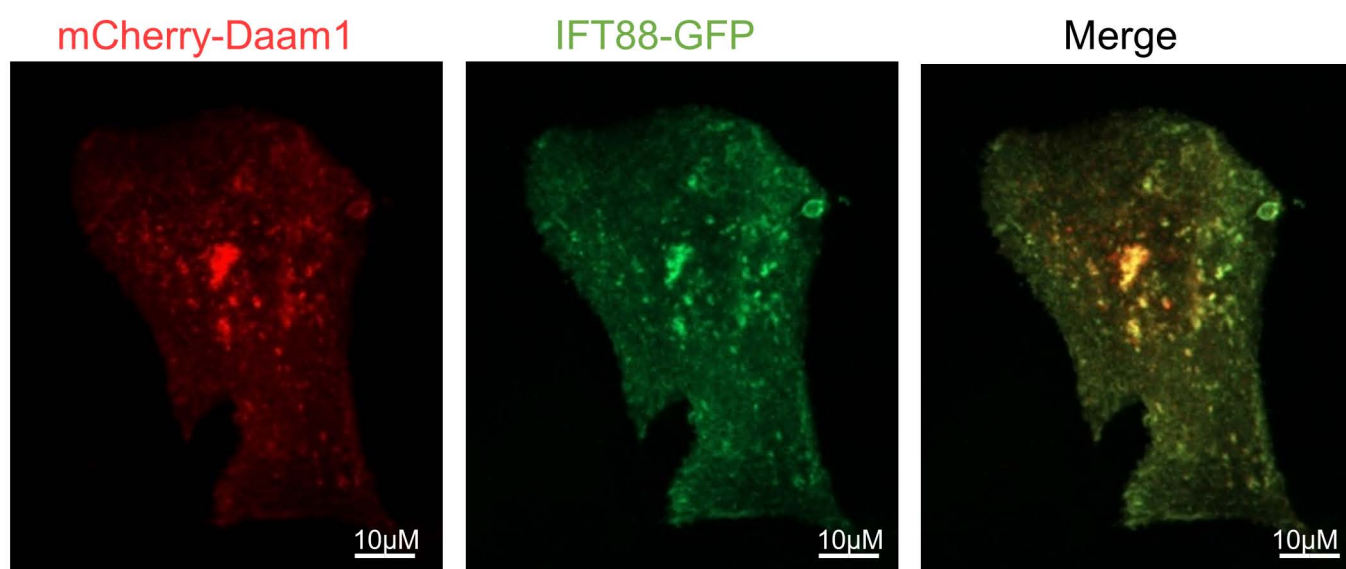

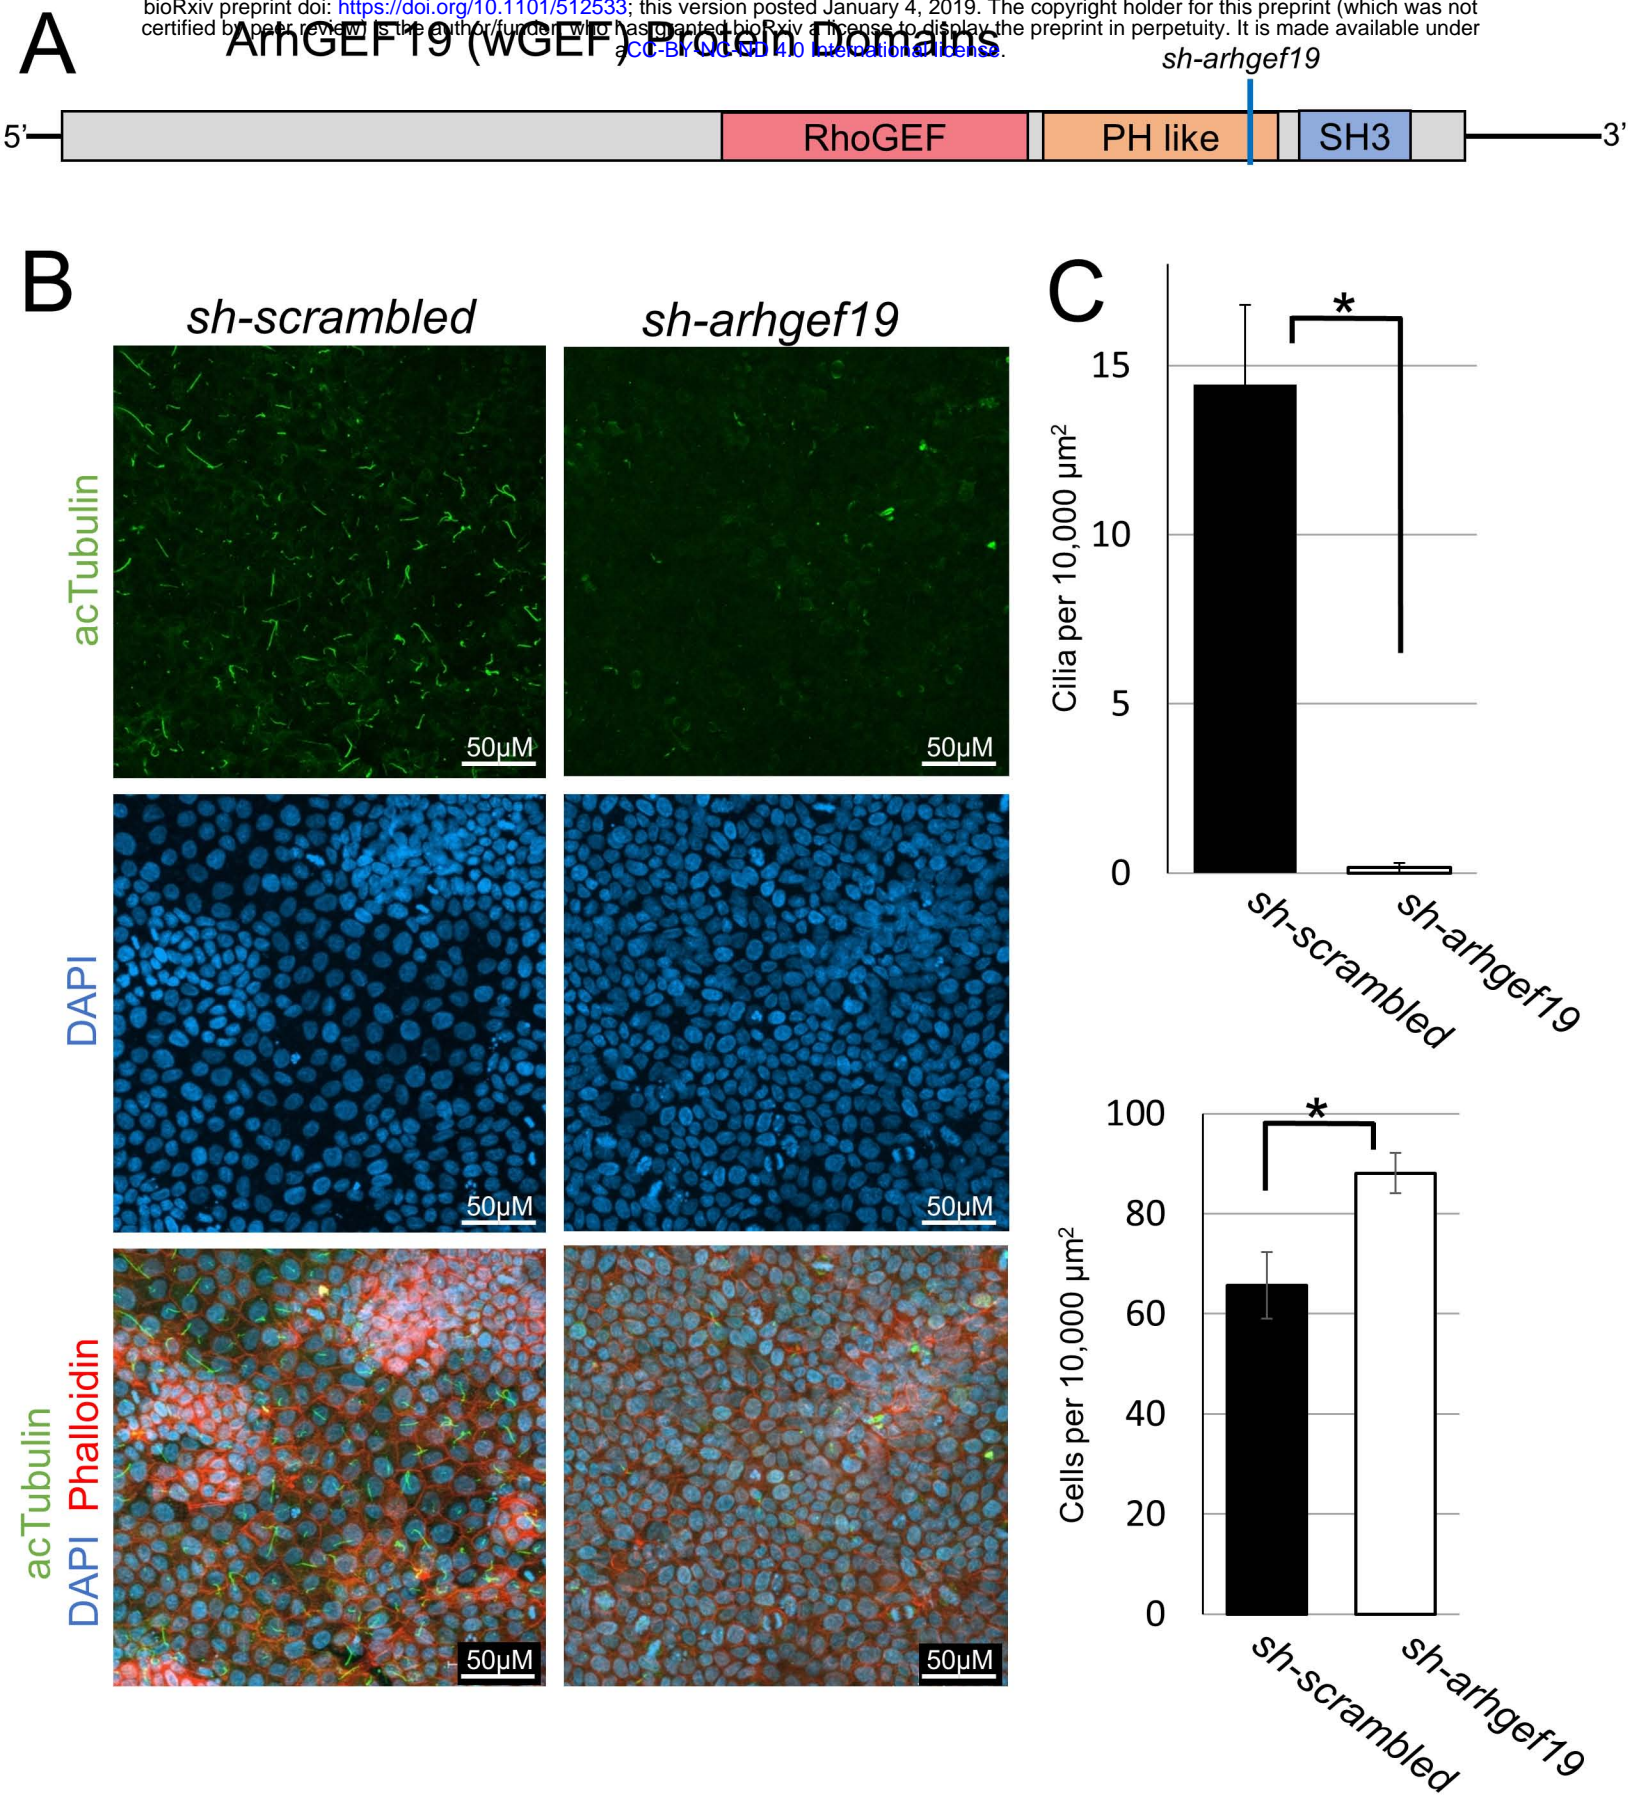

Figure 5

**A**

Control morpholino

Daam1 morpholino

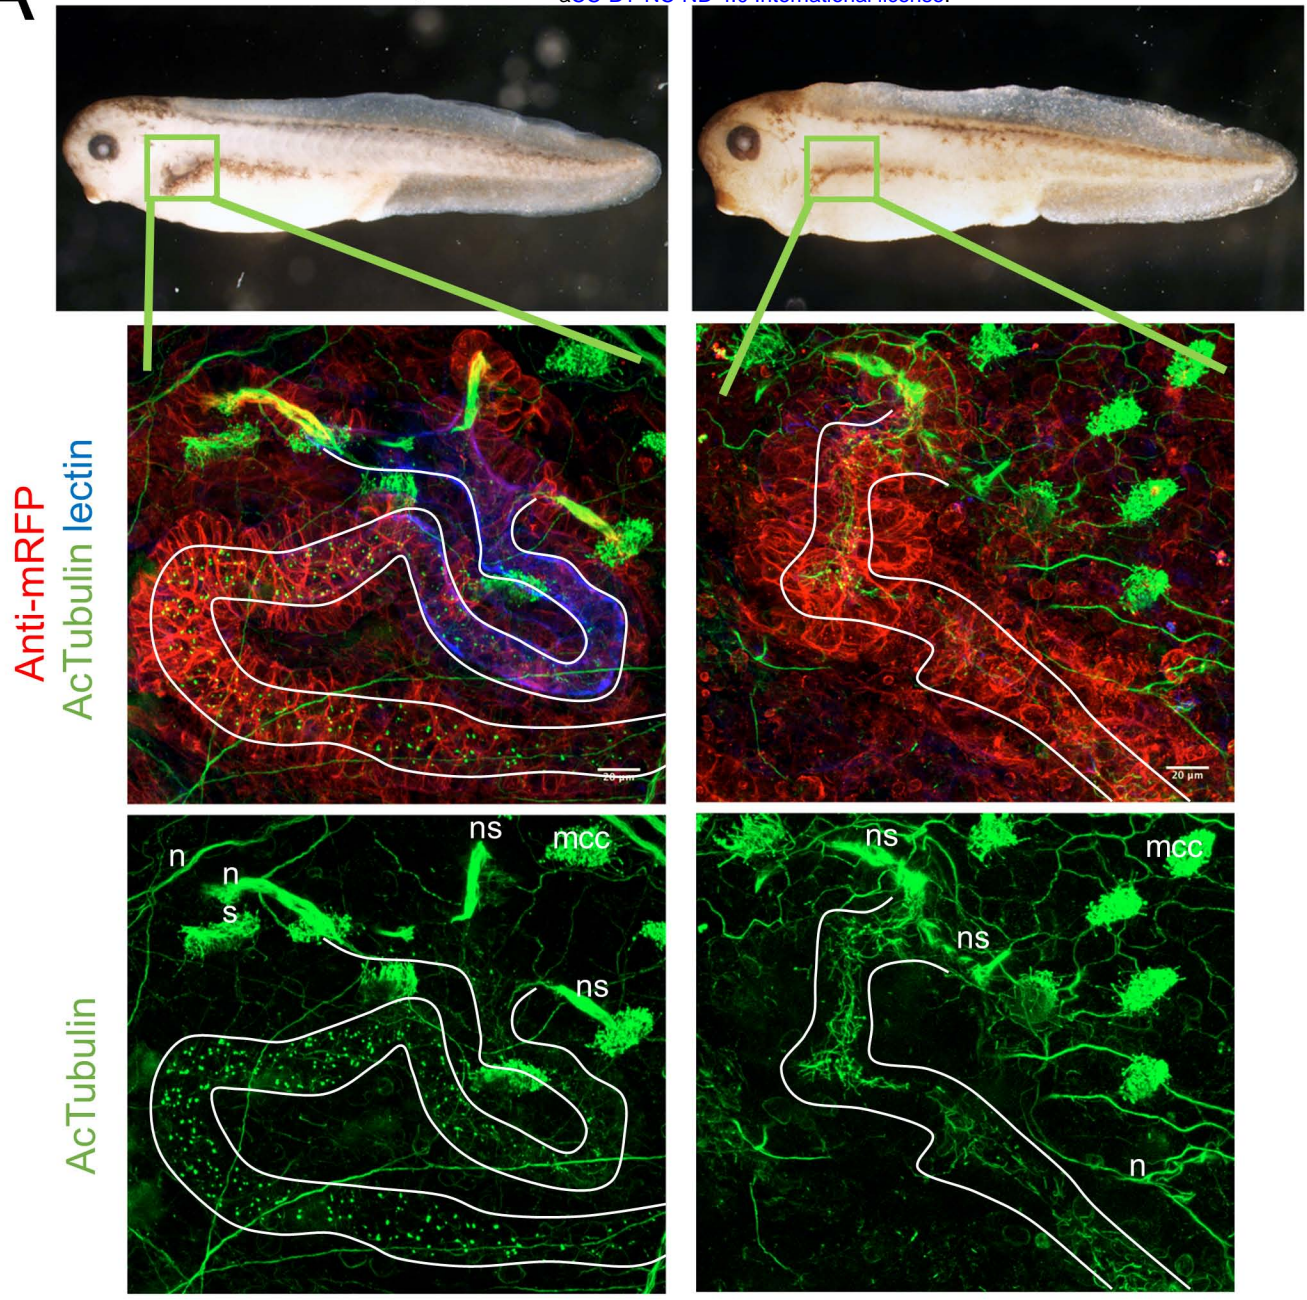

**B**

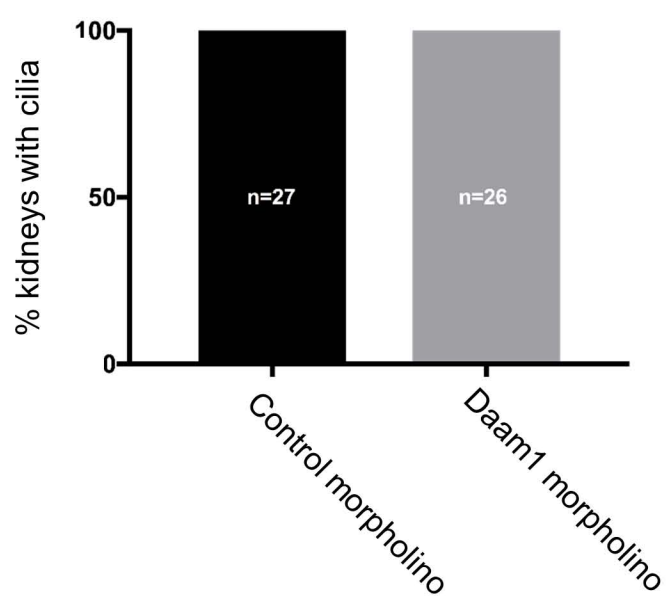

**C**

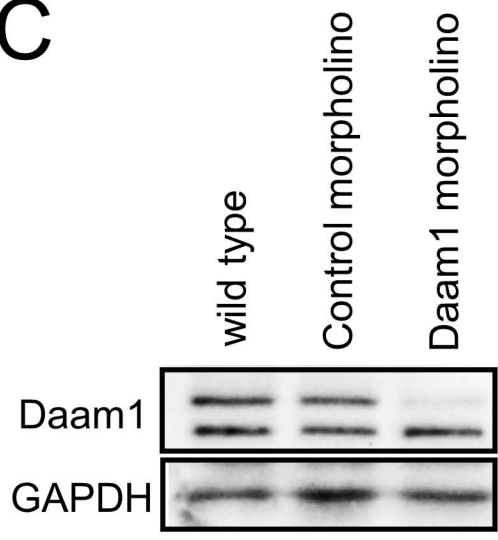

Figure 6

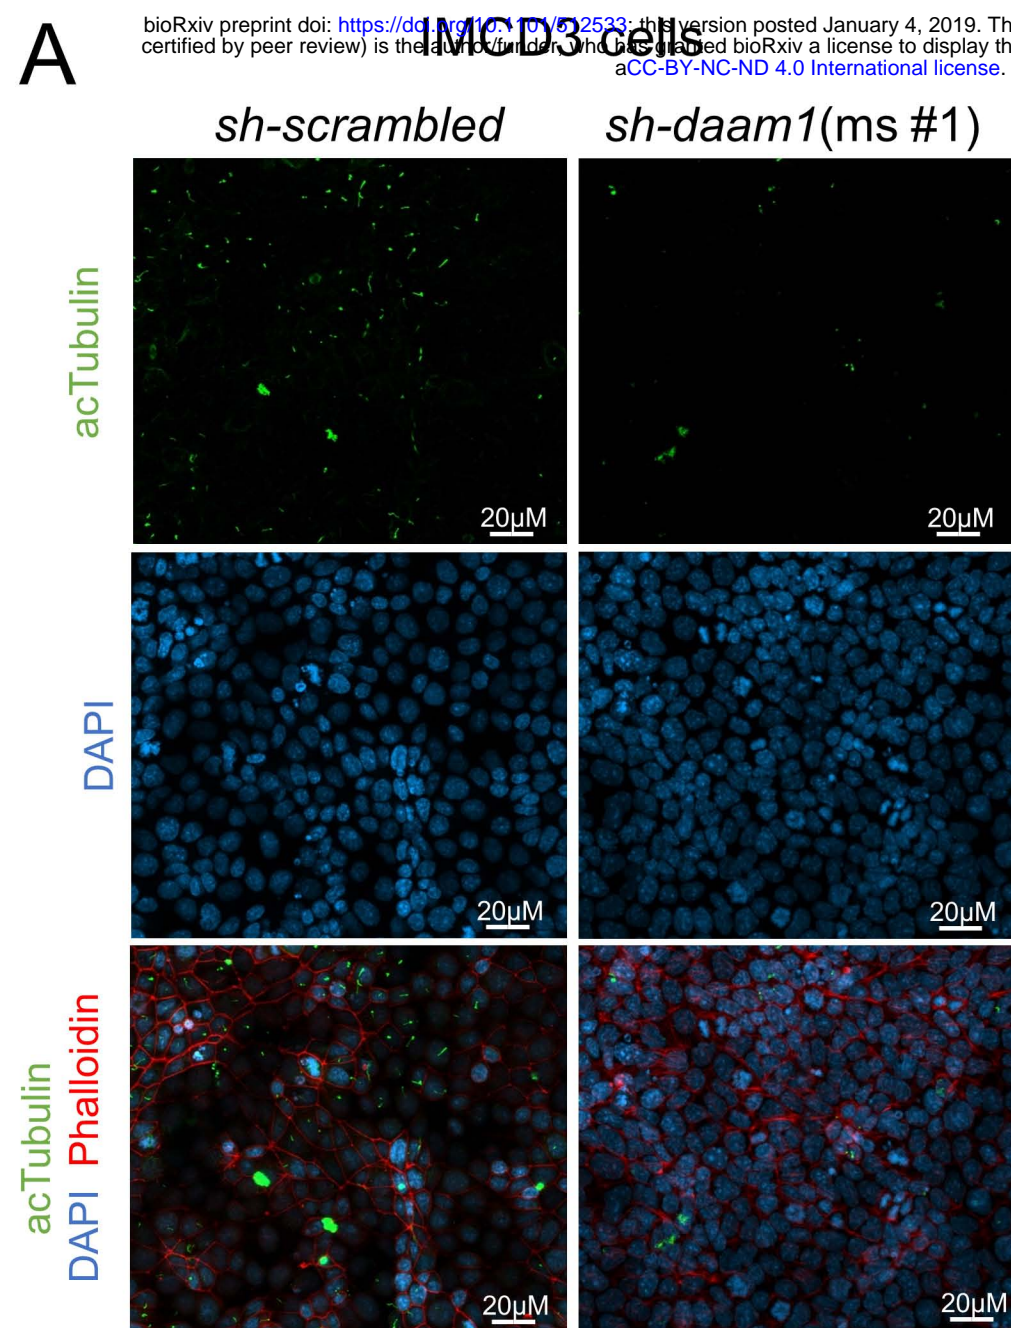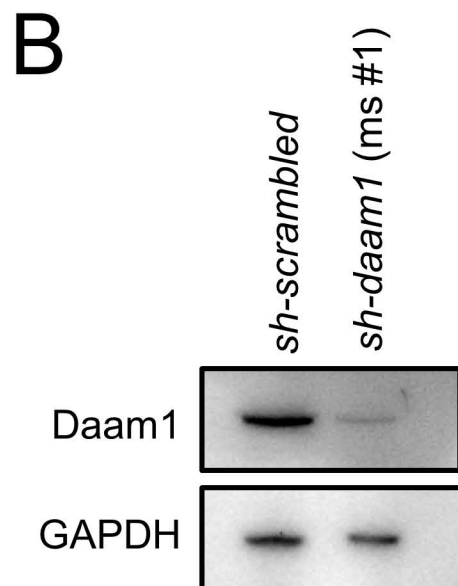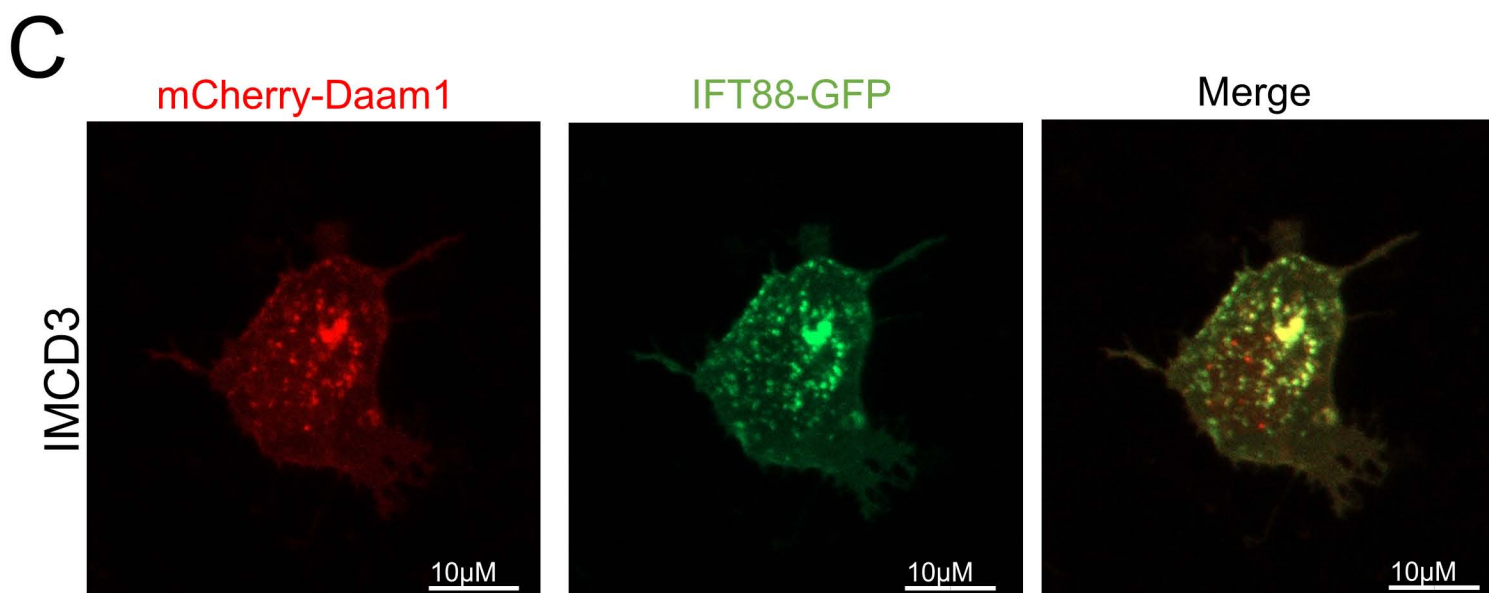

Figure S1

**A**

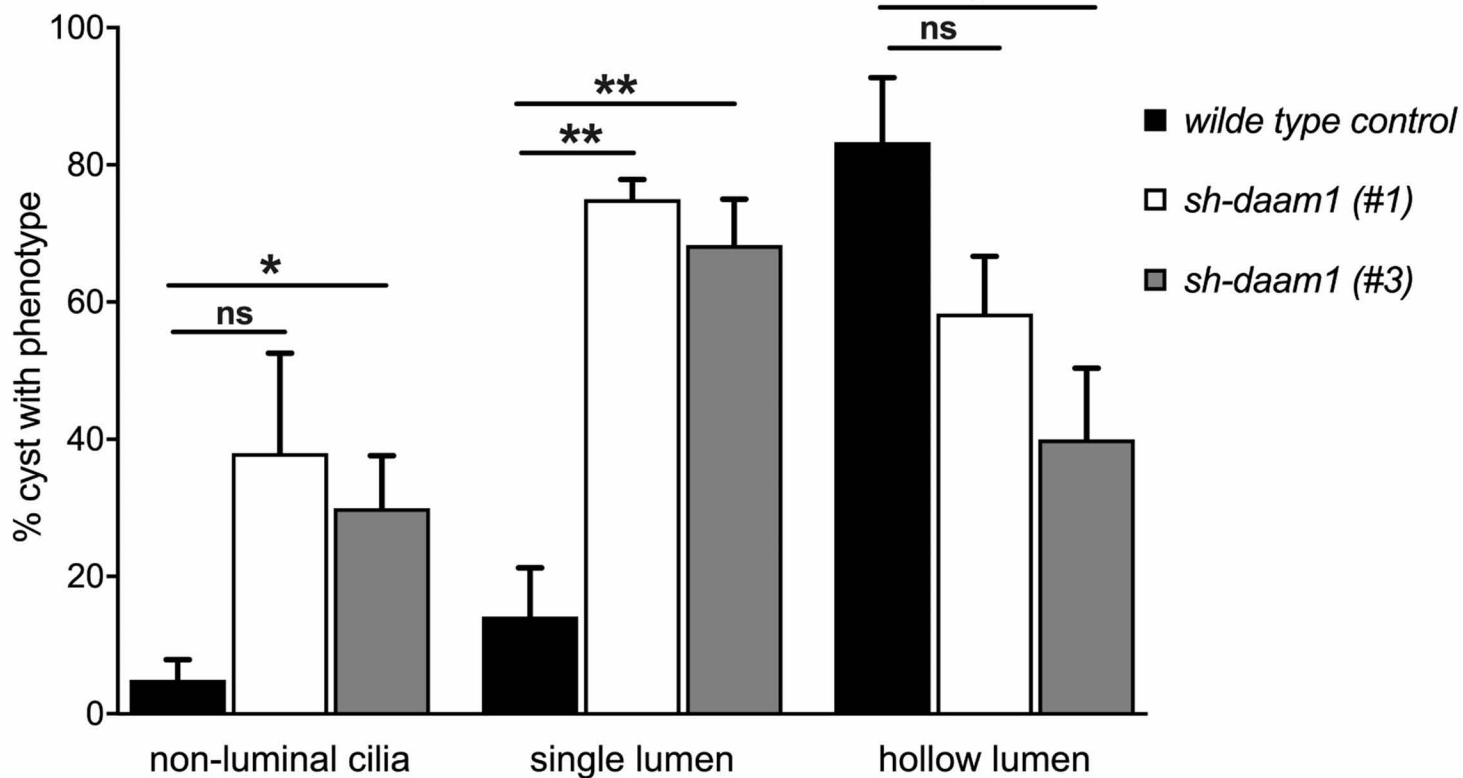

**B**

*wild type control*

*sh-daam1* (#1)

acTubulin DAPI Phalloidin

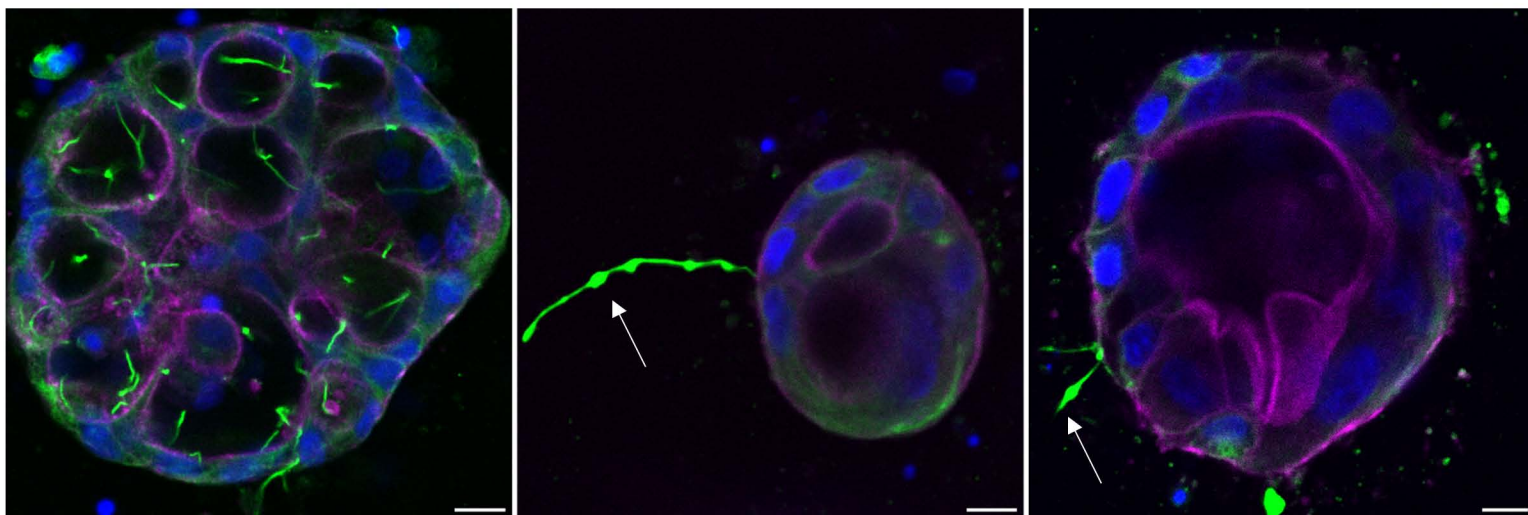

Figure S2

## IMCD3 cells

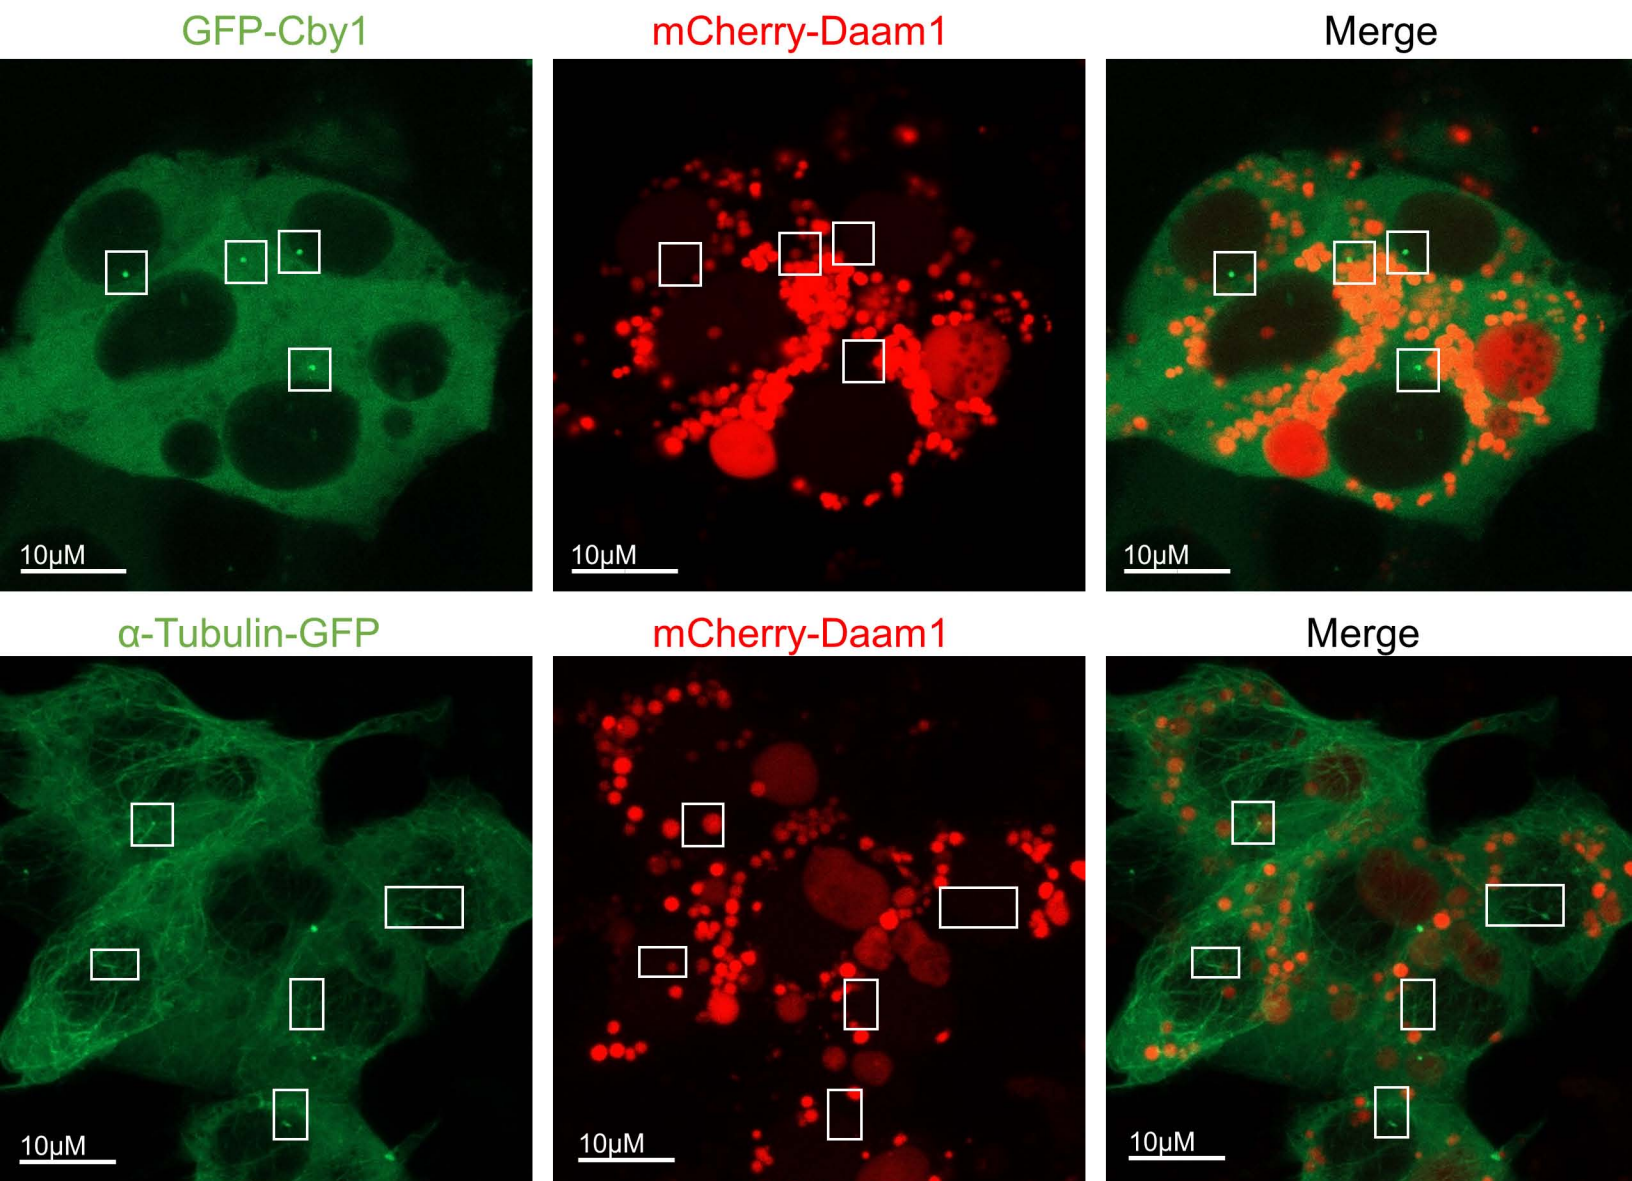

Figure S3

## Control morpholino

## Daam1 morpholino

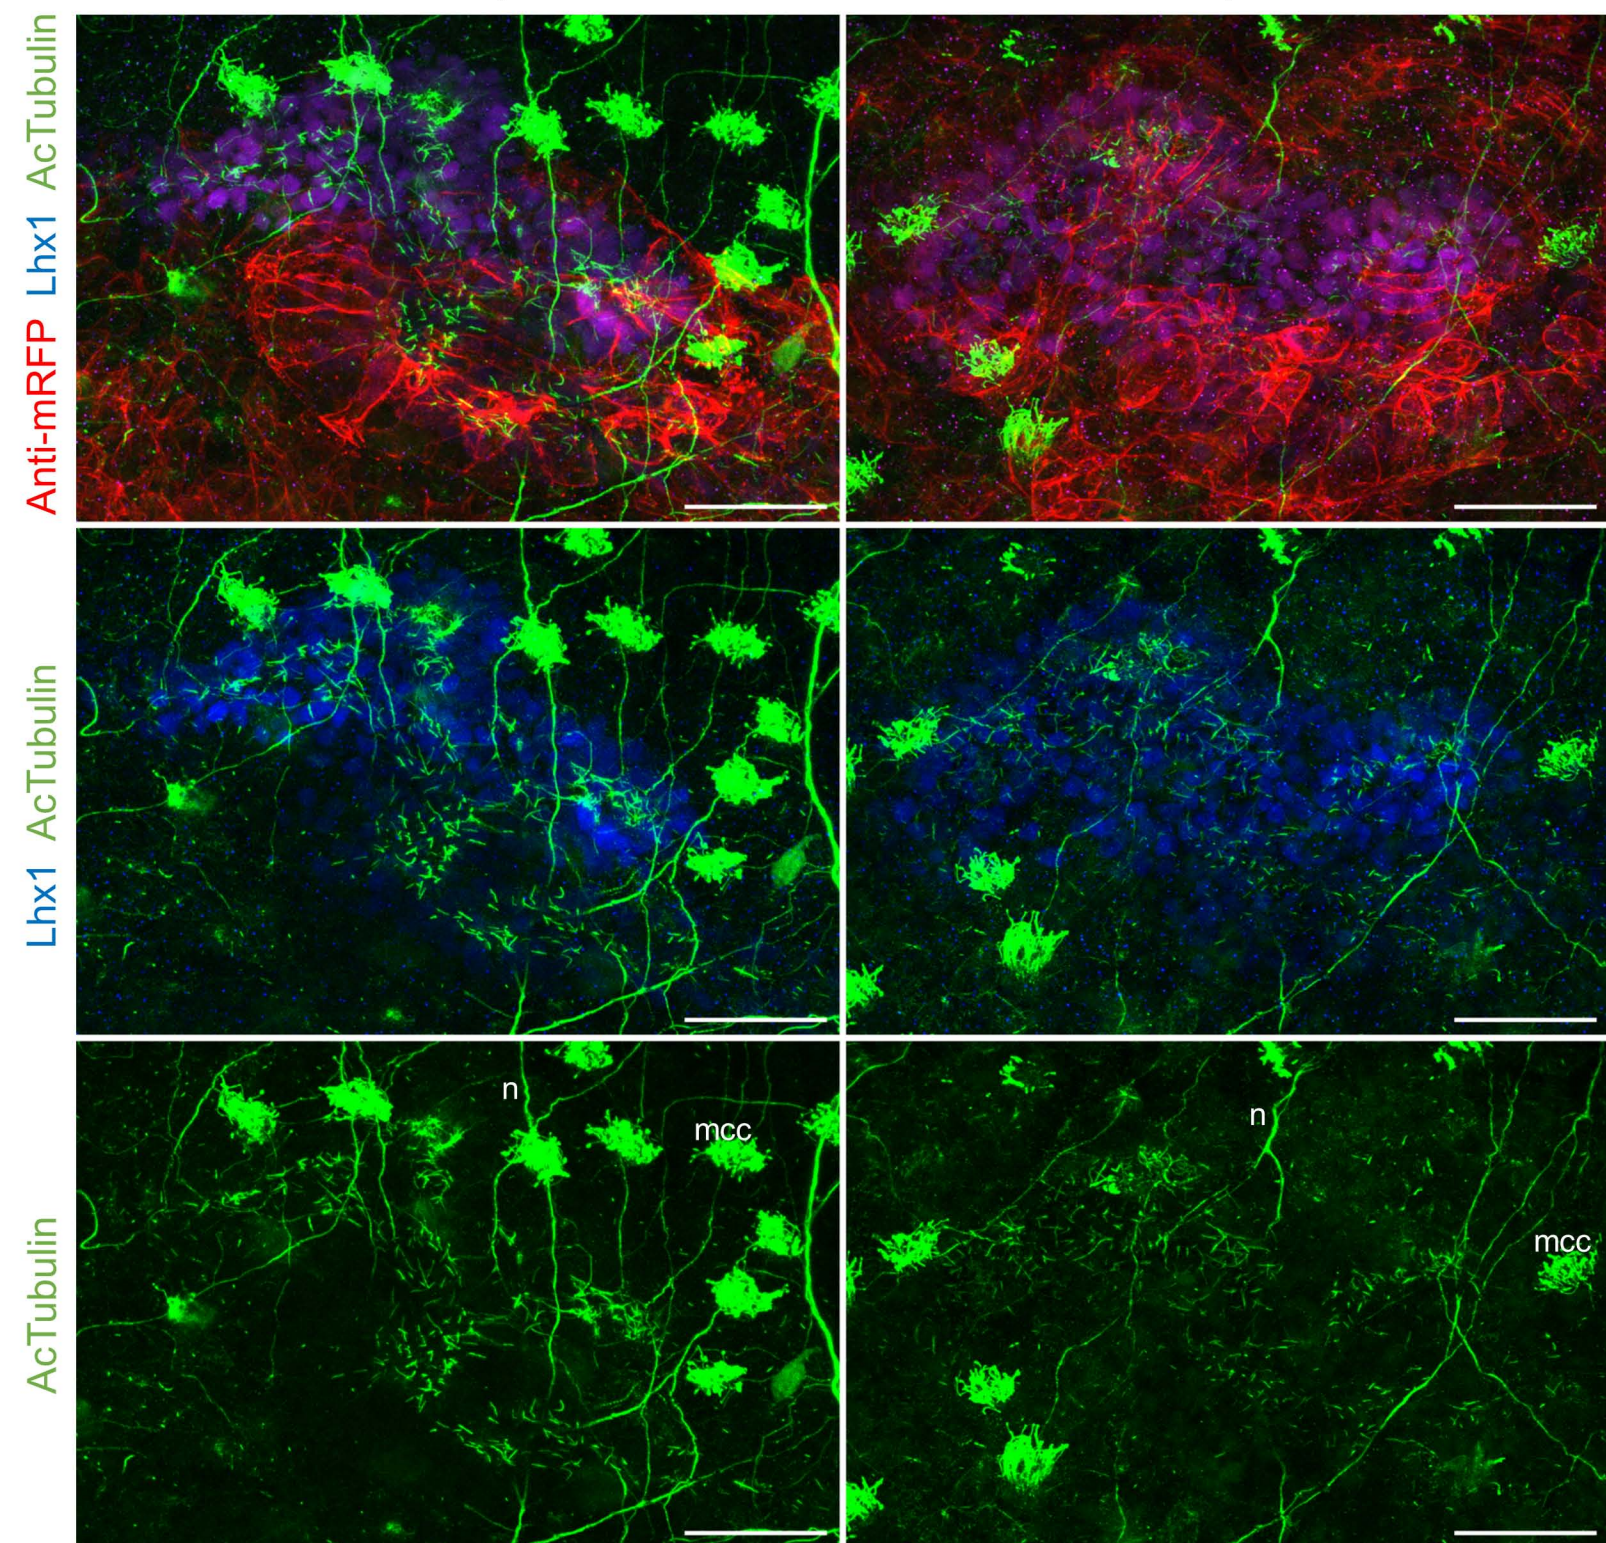

Figure S4



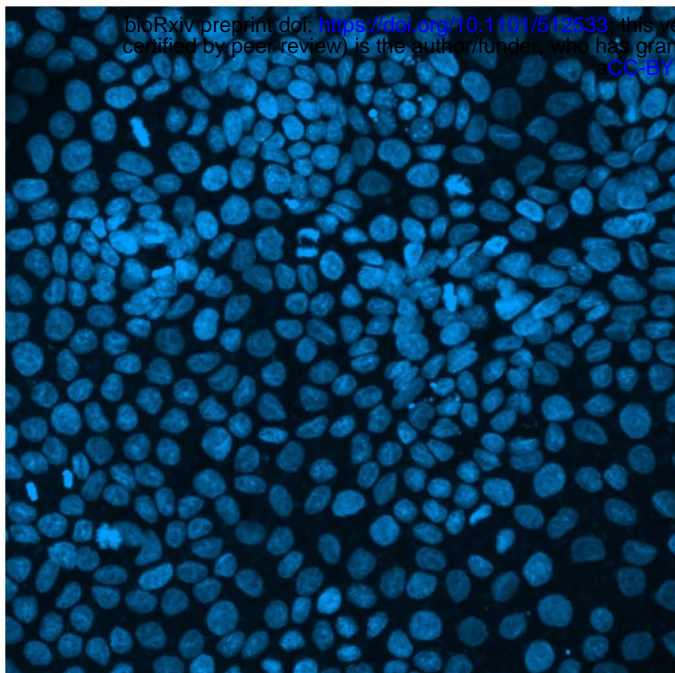

Obtain Just DAPI image

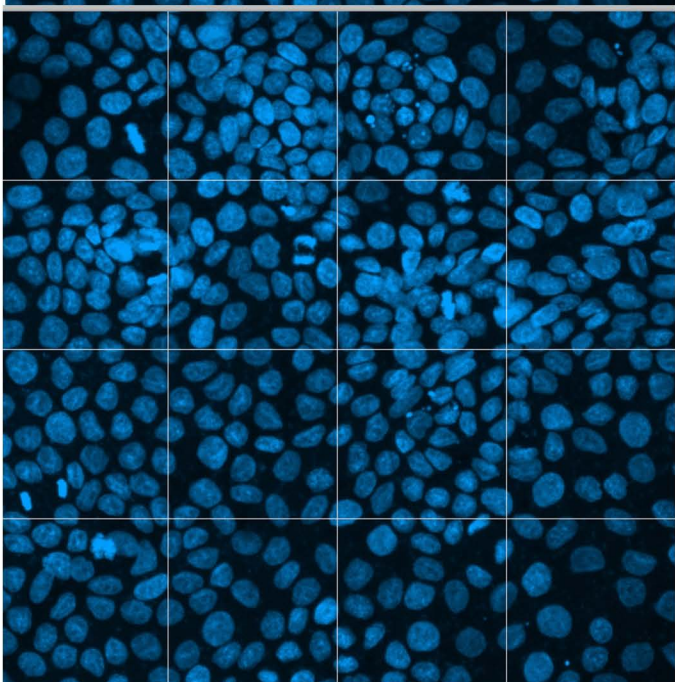

Overlay 4x4 grid  
16 cells total

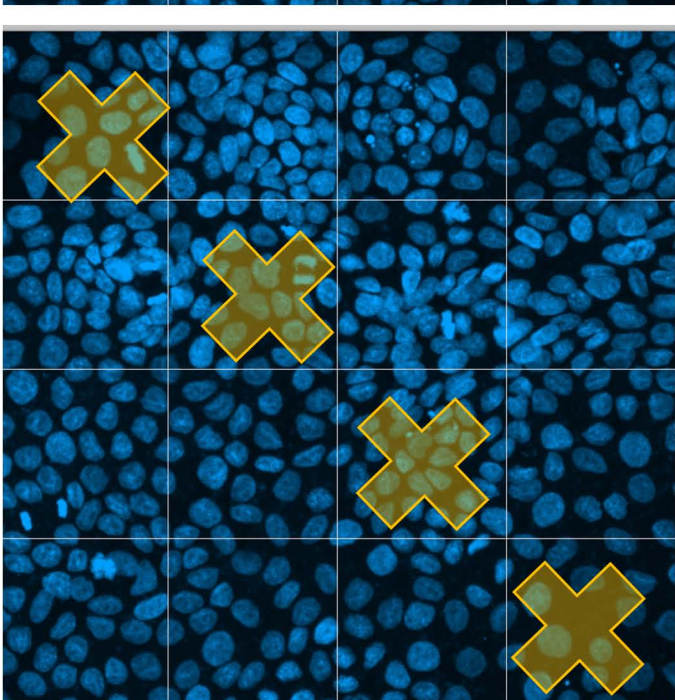

Average 4 cells  
Multiply by 16  
approximate number of cells per image.

Figure S5
